1 **On optimal temozolomide scheduling for slowly growing gliomas**

2 Berta Segura-Collar<sup>1#</sup>, Juan Jiménez-Sánchez<sup>2,3#</sup>, Ricardo Gargini<sup>1#</sup>, Miodrag  
3 Dragoj<sup>4</sup>, Juan M. Sepúlveda<sup>5</sup>, Milica Pešić<sup>4</sup>, Pilar Sánchez-Gómez<sup>1\*</sup>, Víctor M.  
4 Pérez-García<sup>2,3\*</sup>.

5

6 1. Neurooncology Unit, Unidad Funcional de Investigación de Enfermedades  
7 Crónicas (UFIEC), Instituto de Salud Carlos III (ISCIII), Madrid, Spain.

8 2. Mathematical Oncology Laboratory (MOLAB), University of Castilla-La  
9 Mancha, Edificio Politécnico, Avda. Camilo José Cela 3. 13071 Ciudad Real,  
10 Spain.

11 3. Institute of Applied Mathematics in Science and Engineering (IMACI), Castilla-  
12 La Mancha University, Spain.

13 4. Department of Neurobiology, Institute for Biological Research "Siniša  
14 Stanković" - National Institute of Republic of Serbia, University of Belgrade,  
15 Despota Stefana 142, 11060 Belgrade, Serbia.

16 5. Instituto de Investigaciones Biomédicas I+12, Hosp. 12 de Octubre, Madrid  
17 28041, Spain.

18 # Co-first authors

19 \* Co-senior authors

20

21 **Running title:** Optimal temozolomide scheduling for slowly growing gliomas

22 **Corresponding authors:**

23 Víctor M. Pérez-García. Mailing address: Edificio Politécnico. Universidad de  
24 Castilla-La Mancha. Avenida de Camilo José Cela 3. Phone: +34-926295435. E-  
25 Mail: [victor.perezgarcia@uclm.es](mailto:victor.perezgarcia@uclm.es)

26 Pilar Sánchez-Gómez. Mailing address: Instituto de Salud Carlos III. Crtra.  
27 Majadahonda-Pozuelo Km2. Phone: +34-918223265. E-Mail:  
28 [psanchezg@isciii.es](mailto:psanchezg@isciii.es)

29

30 **Funding:** This research was funded by the James S. Mc. Donnell Foundation  
31 (USA) 21st Century Science Initiative in Mathematical and Complex Systems  
32 Approaches for Brain Cancer (Collaborative award 220020560,  
33 doi:10.37717/220020560); Ministry of Education, Science and Technological  
34 Development, Republic of Serbia (ref. number 451-03-9/2021-14/200007);  
35 Ministerio de Ciencia e Innovación and FEDER funds, Spain (grant number  
36 PID2019-110895RB-I00, doi: 10.13039/501100011033 to VMP-G, and RTI2018-  
37 093596 to PS-G); and Universidad de Castilla-La Mancha (grant number 2020-  
38 PREDUCLM-15634 to JJ-S).

39

40 **Conflict of interests:** The authors declare no competing interests.

41 **Authorship:** Study design and analysis: PS-G, JJ-S, JS, MP, VMP-G. Writing of  
42 manuscript: MP, JJ-S, BS-C, RG, PS-G, JS, VMP-G. Research: BS-C, MD, RG,  
43 JJ-S. Mathematical modeling: JJ-S, VMP-G. Software: JJ-S. Murine models: BS-  
44 C, RG, PS-G. Cell cultures: MD, MP. Project supervision: PS-G, VMP-G.  
45 Funding: PS-G, VMP-G. All authors revised and approved the manuscript.

46

47

48

49

50

51 **Background:** Temozolomide (TMZ) is an oral alkylating agent active against  
52 gliomas with a favorable toxicity profile. It is part of the standard of care in the  
53 management of glioblastoma, and is commonly used in low-grade gliomas. *In-*  
54 *silico* mathematical models can potentially be used to personalize treatments and  
55 to accelerate the discovery of optimal drug delivery schemes.

56

57 **Methods:** Agent-based mathematical models fed with either mouse or patient  
58 data were developed for the *in-silico* studies. The experimental test beds used to  
59 confirm the results were: mouse glioma models obtained by retroviral expression  
60 of EGFR wt or EGFR vIII in primary progenitors from p16/p19 ko mice and grown  
61 *in vitro* and *in vivo* in orthotopic allografts, and human glioblastoma U251 cells  
62 immobilized in alginate microfibers. The patient data used to parametrize the  
63 model were obtained from the TCGA/TCIA databases and the TOG clinical study.

64

65 **Results:** Slow growth 'virtual' murine gliomas benefited from increasing TMZ  
66 dose separation *in silico*. In line with the simulation results, improved survival,  
67 reduced toxicity, lower expression of resistance factors and reduction of the tumor  
68 mesenchymal component were observed in experimental models subject to long-  
69 cycle treatment, particularly in slowly-growing tumors. Tissue analysis after long-  
70 cycle TMZ treatments revealed epigenetically-driven changes in tumor  
71 phenotype, which could explain the reduction in glioma growth speed. *In-silico*  
72 trials provided support for methods of implementation in human patients.

73

74 **Conclusions:** *In-silico* simulations, and *in-vitro* and *in-vivo* studies show that  
75 TMZ administration schedules with increased time between doses may reduce

76 toxicity, delay the appearance of resistances and lead to survival benefits

77 mediated by changes in the tumor phenotype in gliomas.

78

79 **Keywords:** Glioblastoma, Mathematical Oncology, Temozolomide, Drug

80 resistance, Persisters, *In-silico* trials, optimal drug scheduling, personalized

81 oncology, tumor phenotype.

82



83 **IMPORTANCE OF THE STUDY**

84

85 *In-vivo* evidence is provided of improvements in survival, resistance, and toxicity  
86 from TMZ schemes with long rest periods between doses in slowly-growing GBM  
87 mouse models. The results match hypotheses generated *in silico* using a  
88 mathematical model incorporating the main biological features and fed with real  
89 patient data. An epigenetically-driven change in tumor phenotype was also  
90 revealed experimentally, which could explain the reduction in glioma growth  
91 speed under the 'long cycle' scheme. To determine the extent to which our results  
92 hold for human patients, large sets of simulations were performed on virtual  
93 patients. These *in-silico* trials suggest different ways to bring the benefits  
94 observed in experimental models into clinical practice.

95

## 96 INTRODUCTION

97 Adult gliomas are the most common primary malignant tumors of the central  
98 nervous system. A novel classification of these neoplasms has been proposed<sup>1-</sup>  
99 <sup>3</sup>, using a combination of molecular and histopathological features,. Especially  
100 important for patient prognosis is the presence of mutations in the isocitrate  
101 dehydrogenase 1/2 (IDH1/2) genes, which distinguishes IDH mutant (IDHmut)  
102 gliomas from IDH wild-type (IDHwt) glioblastomas (GBM)<sup>4</sup>. GBMs are diagnosed  
103 at a later age (median 64) and are characterized by the presence of additional  
104 alterations. Some of them are mutations in the telomerase reverse transcriptase  
105 (TERT) promoter, amplification of the epidermal growth factor receptor (EGFR),  
106 and gains and losses of chromosomes 7 and 10, respectively<sup>5</sup>. GBMs have a  
107 dismal prognosis (15 months' overall survival) despite the standard-of-care  
108 treatment, which consists of maximal surgical resection followed by radiotherapy  
109 (RT) plus concomitant and adjuvant chemotherapy (CT) with temozolomide  
110 (TMZ), an oral alkylating agent<sup>6,7</sup>. TMZ is administered orally at a dose of 75  
111 mg/m<sup>2</sup> daily throughout RT, plus six cycles of maintenance TMZ 150–200 mg/m<sup>2</sup>  
112 for 5 out of 28 days<sup>6</sup>. The cytotoxicity of this drug is attributed to the addition of  
113 methyl groups to DNA, and especially to the formation of O6-methylguanine (O6-  
114 meG) lesions and the subsequent formation of double-strand breaks during DNA  
115 replication, which requires cell division for the emergence of the cytotoxicity. As  
116 O6-meG can be removed by methylguanine methyltransferase (MGMT) in tumors  
117 expressing this protein, MGMT promoter methylation is considered a predictive  
118 biomarker of TMZ response in gliomas<sup>8</sup>. However, challenges remain in  
119 establishing reliable inter-laboratory assays<sup>9</sup>, as well as in estimating the effect  
120 of limited MGMT promoter methylation on outcomes<sup>10</sup>. Moreover, based on the

121 short half-life of TMZ, it was suggested that high doses or repeated doses could  
122 improve the effect of this commonly-used drug, and reduce the capacity of cells  
123 to repair the DNA<sup>11</sup>. However, dose-dense TMZ, with the administration of lower  
124 but continuous doses with the aim of depleting intracellular MGMT, did not show  
125 improved efficacy in newly diagnosed GBM,<sup>12</sup> and has shown only modest results  
126 in recurrent tumors<sup>13-16</sup> at the cost of increased hematological toxicity. Simple  
127 mathematical models of lower grade gliomas (LGG) (grade 2/3 gliomas) have  
128 suggested that TMZ schemes with longer rest periods between cycles could  
129 improve the survival of patients<sup>17</sup>. However, no study has tested the efficacy of  
130 longer spacing between cycles/doses. Therefore, there may be room for  
131 improvements in the schedules used for TMZ administration to glioma patients.  
132 Mathematical models describe real systems by abstraction and mathematical  
133 formalism. They enable extrapolation beyond the situations originally analyzed,  
134 allowing for quantitative predictions, inference of mechanisms, falsification of  
135 underlying biological hypotheses, and quantitative descriptions of relationships  
136 between different components of a system. They cannot replace experimental  
137 results obtained by biomedical models, but may complement experimentation in  
138 providing a broader picture<sup>18</sup>. Moreover, in the field of oncology they can suggest  
139 what the best RT, CT or combination regimens might be, aiding the  
140 implementation of the treatment of different cancers, including gliomas. A number  
141 of mathematical models of LGGs have been constructed in order to study the  
142 optimal delivery scheme of cytotoxic therapies<sup>17,19,20,21</sup>. It is important to  
143 emphasize that in slow-growth gliomas, such as LGGs, only a small percentage  
144 of cells is proliferating as shown by fractions of Ki67 positive cells typically below  
145 5%<sup>22</sup>. Notably, even in GBM, there is a small group of tumors with reduced

146 Ki67%<sup>23</sup>. It may be guessed that intensive therapies intended to deliver the  
147 maximum tolerated dose in the shortest possible time may be overkill for these  
148 tumors. Indeed, several authors have proposed that schemes with longer spacing  
149 between doses could produce better results in LGG patients<sup>17,20,21,24</sup>. However,  
150 the simple mathematical models developed previously account only for a limited  
151 number of key biological processes. Notably, no detailed theoretical models,  
152 including realistic resistance mechanisms, have been considered previously.  
153 Also, it is still unknown whether the potential gain observed *in silico* for LGGs  
154 would apply to GBMs as well. First of all, the proneural (PN) to mesenchymal  
155 (MES) phenotypic transition observed in GBMs, either spontaneously or as a  
156 result of (CT/RT), would limit the effect of TMZ as the tumor becomes more  
157 resistant<sup>25,26</sup>. Also, from the biological point of view, there is a growing body of  
158 literature suggesting that the evolution of tumor cells to a fully drug-resistant state  
159 may often proceeds through a reversible drug-tolerant phase<sup>27</sup>, so-called  
160 persister cells<sup>28</sup>. Rabé et al identified a population with persister characteristics  
161 under TMZ treatment of glioma cells<sup>29</sup>. One may guess that longer spacing  
162 between cycles could delay the PN-MES transition, as well as allowing for  
163 persister cells to revert to their normal sensitive states. Neither of these facts has  
164 been accounted for by previous mathematical modeling approaches.

165 The intention of this paper was to set out a proof of concept supporting treatment  
166 regimes with longer times between doses of TMZ (hereafter referred to as  
167 protracted temozolomide schedules, PTS). Our hypothesis was that PTS could  
168 lead to reduced appearance of persister cells. Moreover, reduced toxicity and  
169 increased tolerance was anticipated from increasing the rest period between  
170 cycles. To test these ideas, a stochastic mesoscopic discrete mathematical

171 model was first produced, including all relevant biological processes expected to  
172 play a role in the response of GBMs to TMZ. Next, PTS was studied *in vitro* and  
173 in animal models and found to be in good agreement with the *in silico*  
174 observations. The tissue of TMZ-responding allografts was then analyzed, and  
175 showing a striking change in tumor phenotype, with an increase in PN and a  
176 decrease in MES markers, driven by epigenetic changes, which could explain the  
177 reduction in tumor growth. Finally, exploratory virtual 'clinical' trials were  
178 performed with *in-silico* tumors simulated with the previous mathematical model,  
179 to guide the implementation of the concept in clinical practice. The results  
180 indicated that survival is increased as spacing between doses becomes  
181 progressively larger, until a threshold is reached; spacings beyond this threshold  
182 would fail to improve survival.

183

## 184 **METHODS**

185

### 186 **Cell lines and cell culture**

187 The human GBM U251 cell line was purchased from American Type Culture  
188 Collection (ATCC, USA). It was cultured in Dulbecco's Modified Eagle Medium  
189 (Biological Industries, USA) supplemented with 10% fetal bovine serum (Sigma-  
190 Aldrich, Germany), 2 mM glutamine (Sigma-Aldrich, Germany), 5,000 U/ml  
191 penicillin, and 5 mg/ml streptomycin (Gibco™, Thermo Fisher Scientific, United  
192 States). Cells were cultivated at 37°C in a humidified 5% CO<sub>2</sub> atmosphere and  
193 passaged twice a week after reaching 80-90% confluence using 0.25%  
194 trypsin/EDTA.

195

196 Mouse SVZ cell lines were obtained by retroviral expression of EGFRwt or  
197 EGFRvIII (pBabe-EGFR wt (#11011) and MSCV-XZ066-GFP-EGFR vIII  
198 (#20737)) in primary neural stem cell cultures obtained from the subventricular  
199 zone (SVZ) of p16/p19 ko mice<sup>30</sup>. After infection, the cells were injected into nude  
200 mice, and the tumors that grew were dissociated and the lines SVZ-EGFRwt/amp  
201 and SVZ-EGFRvIII were established<sup>31</sup>. Both models express GFP and luciferase  
202 as a reporter. Cells were grown as previously described<sup>30,31</sup>. Briefly, they were  
203 maintained in stem cell medium; Neurobasal (Invitrogen) supplemented with B27  
204 (1:50) (Invitrogen); GlutaMAX (1:100) (Invitrogen); penicillin-streptomycin (1:100)  
205 (Lonza); 0.4% heparin (Sigma-Aldrich); and 40 ng/ml EGF and 20 ng/ml bFGF2  
206 (Peprotech). For dissociation and passage Accumax (ThermoFisher) was used.

207

#### 208 **Production of alginate microfibers with U251 immobilized cells**

209 Alginate microfibers with cells were produced by extrusion as described earlier<sup>32</sup>.  
210 U251 cell lines were immobilized in alginate microfibers by the same procedure.  
211 Briefly,  $4 \times 10^6$  cells/ml were mixed with a 2 % w/v Na-alginate solution to obtain  
212 final concentrations of 1.5% w/v Na-alginate. The Na-alginate solution with cells  
213 was manually extruded through a blunt edge stainless steel 25G needle  
214 immersed in the gelling bath (3 % w/v  $\text{Ca}(\text{NO}_3)_2 \times 4\text{H}_2\text{O}$ ). Due to the exchange of  
215  $\text{Na}^+$  with  $\text{Ca}^{2+}$ , the liquid stream solidified in the gelling bath, thus forming  
216 insoluble microfibers. The microfibers were left in the bath for 15 min in order to  
217 complete gelling and were then washed with medium. After cell immobilization,  
218 0.5 g of alginate fibers were distributed into a T25 flask and cultured for 28 days  
219 without passage in 13 ml of MEM medium. 50% of the medium was changed  
220 twice a week.

221

## 222 **Viability study**

223 The impact of three different TMZ (Sigma-Aldrich) (100  $\mu$ M) treatment modalities  
224 (everyday treatments, X+1, and protracted (every 3 days, X+3; every 7 days,  
225 X+7)), starting from day 7, was determined by comparing the effects on cell  
226 viability, morphology, and aggregation using a CalceinAM (CAM)/propidium-  
227 iodide (PI) assay. U251 cells immobilized in alginate microfibers were cultured  
228 for 28 days and stained using CAM/PI as a LIVE/DEAD staining. Alginate  
229 microfibers containing cells were incubated for 45 min at 37 °C in medium with  
230 CAM in a final concentration of 4  $\mu$ M while PI was added to a final concentration  
231 of 5  $\mu$ M. Fluorescence microscopy images were taken using a Leica TCS SP5 II  
232 Basic confocal laser-scanning microscope (Leica Microsystems CMS GmbH;  
233 Germany), visualizing live (green) and dead (red) cells at every z-axis  
234 encompassing the alginate microfiber. Z-stack projections and quantitative  
235 estimation of the cell mass were analyzed using ImageJ software.

236

## 237 ***In-vitro* treatments of mouse cells**

238 SVZ EGFR wt/amp cells were incubated in the presence of TMZ (25  $\mu$ M), which  
239 was supplemented three times: one day (X+1), three days (X+3) or seven days  
240 (x+7) after the first dose. In a different experiment, SVZ EGFR wt/amp cells were  
241 treated with TMZ (25  $\mu$ M) and/or Azacytidine (AZA) (Sigma-Aldrich) (5  $\mu$ M) for 8  
242 days. For both experiments, cells were collected and lysed and subsequently  
243 analyzed by qRT-PCR, as described below.

244

## 245 **Intracranial tumor formation and treatment *in vivo***

246 Animal experiments were reviewed and approved by the Research Ethics and  
247 Animal Welfare Committee at “Instituto de Salud Carlos III” (PROEX 02/16), in  
248 agreement with the European Union and national directives. Intracranial  
249 transplantation to establish orthotopic allografts was performed injecting 300,000  
250 cells (resuspended in 2  $\mu$ l of culture cell medium) with a Hamilton syringe into  
251 athymic Nude-Foxn1nu brains (Harlan Iberica). Female mice (2-3 months of age)  
252 were used, 7 to 10 animals per group. The injections were made into the striatum  
253 (coordinates: A–P, –0.5 mm; M–L, +2 mm, D–V, –3 mm; related to Bregma) using  
254 a Stoelting Stereotaxic device. Mice were treated with TMZ (10 or 50 mg/kg  
255 through intraperitoneal injection, i.p., with the schedules given in the various  
256 experiments). TMZ was dissolved in PBS+1% BSA, which was used to treat  
257 control animals.

258

### 259 **Immunohistochemical (IHC) staining**

260 Tumor samples were fixed in 10% formalin overnight, dehydrated through a  
261 series of graded ethanol baths and then infiltrated with paraffin. Then, 2.5  $\mu$ m-  
262 thick sections were obtained in a microtome and then sections were rehydrated  
263 and permeabilized (1% triton X-100). Antigen retrieval was performed with Citrate  
264 Buffer (10 mM, pH 6) in a pressure cooker (2 min). Endogenous peroxidase  
265 inhibition and blocking with normal horse serum was also carried out before the  
266 incubation with primary antibodies (anti-rabbit caspase3, 1:100, Cell signaling  
267 #9662), anti-mouse ki67, 1:100 Dako #M7248) (overnight, 4 °C) and biotinylated  
268 secondary antibodies (HRP anti-mouse and HRP anti-rabbit, 1:200, GE  
269 Healthcare (2h at room temperature). Target proteins were detected with the ABC  
270 Kit and the DAB kit (Vector Laboratories).



271

## 272 **Western Blot analysis**

273 For protein expression analysis, mouse tumor tissue was processed by  
274 mechanical disruption in a lysis buffer (Tris-HCl pH 7.6, 1mMEDTA, 1mMEGTA,  
275 1% SDS, and 1% Triton X-100) followed by heating for 15 min at 100°C. Protein  
276 content was quantified by using a BCA Protein Assay Kit (Thermo Fisher  
277 Scientific). Approximately 30 µg of proteins were resolved by 10% or 12% SDS-  
278 PAGE, and these were then transferred to a nitrocellulose membrane (Hybond-  
279 ECL, Amersham Biosciences, Little Chalfont, UK). The membranes were blocked  
280 for 1 h at room temperature in TBS-T (10 mM Tris-HCl (pH 7.5), 100 mM NaCl,  
281 and 0.1% Tween-20) with 5% skimmed milk, and then incubated overnight at 4  
282 °C, with the corresponding primary antibody (mouse anti-MGMT 1:1000, BD  
283 Biosciences, #557045), mouse anti-GAPDH (1:1.500, Santa Cruz Biotechnology  
284 #sc-47724), rabbit anti-pTyr1068-EGFR (1:1.000, Cell Signaling #3777) and  
285 rabbit anti-phospho-NF-kB p65 (Ser536) (1:1000, Cell Signaling #3033) diluted  
286 in TBS-T. After being washed 3 times with TBS-T, the membranes were  
287 incubated for 2 h at room temperature with their corresponding secondary  
288 antibody (HRP-conjugated anti-mouse (#NA931) or anti-rabbit (#NA934),  
289 Amersham Biosciences) diluted in TBS-T.

290

## 291 **RNA extraction and RT-PCR**

292 The impact of three different TMZ treatment modalities was determined by  
293 comparing the effects on gene expression in human glioma cells and in the  
294 mouse models.

295 - Human glioma cells: After 28 days of incubation, alginate microfibers with  
296 U251 cells were dissolved and cells were released. To release cells, alginate  
297 microfibers were dissolved in 0.5 mM EDTA for 10 min at 37°C. Total RNA  
298 was extracted from control and treated group of cells. The extractions were  
299 carried out using Tri Reagent Solution (Invitrogen LifeTechnologies, USA)  
300 according to the manufacturer's instructions. cDNA was synthesized using 2  
301 µg total RNA and High-capacity cDNA reverse transcription kit (Applied  
302 Biosystems, USA) according to the manufacturer's instructions.

303 - Mouse samples. Brain tumors were dissected out after the mouse sacrifice  
304 and fresh frozen. Alternatively, mouse cells grown *in vitro* were collected and  
305 fresh frozen. RNA was extracted from the tissue or the cells using the RNA  
306 isolation Kit (Roche). Total RNA (1µg) was reverse transcribed with  
307 PrimeScript RT Reagent Kit (Takara).

308 Quantitative real time PCR was performed using the Light Cycler 1.5 (Roche)  
309 with the SYBR Premix Ex Taq (Takara). The primers used for each reaction are  
310 indicated in Supplementary Table S1. All experiments were performed in triplicate  
311 and relative gene expression levels were analyzed by the 2<sup>-ddCt</sup> method<sup>33</sup>.

312

### 313 ***In-silico* analysis**

314 The Cancer Genome Atlas (TCGA) GBM dataset was accessed via UCSC xena-  
315 browser (<https://xenabrowser.net>) to extract proliferation gene expression levels.

316 Classification into classical, mesenchymal, neural and proneural subtypes was  
317 retrieved from the TCGA GBM data set<sup>5</sup>, together with gene expression values.

318 Differences in gene expression between different groups were calculated using  
319 Student's t-test.

320

### 321 **Statistical analysis**

322 The difference between experimental groups was assessed by paired *t*-test and  
323 one-way analysis of variance (ANOVA). For Kaplan-Meier survival curves, the  
324 significance was determined by the two-tailed log-rank test. All analyses were  
325 carried out with the GraphPad Prism 5 software. *P* values below 0.05 were  
326 considered significant (\**P* < 0.05; \*\**P* < 0.01; \*\*\**P* < 0.001; \*\*\*\**P* < 0.0001; n.s.,  
327 not significant), both for mouse and simulated tumors. All experimental  
328 quantitative data presented are the means +/- SEM from at least three samples  
329 or experiments per data point.

330

### 331 **Discrete mathematical model**

332 An on-lattice agent-based mesoscopic model<sup>35</sup> was adapted to simulate the  
333 longitudinal growth dynamics of glioma and its response to treatments *in silico*. A  
334 comprehensive model description is provided in the Supplementary Information.  
335 This study included three basic cellular populations: proneural cells (either  
336 proliferative PNs or quiescent PNq), persister cells (P), and mesenchymal cells  
337 (either proliferative MESs or quiescent, MESq). The cell dynamics between  
338 different compartments is summarized in Figure S4 (and in the Supplementary  
339 Information). It was assumed that PN cells may become MES cells, either directly,  
340 due to local vessel damage and hypoxia once the local cell density exceeds a  
341 critical threshold, or through a transient intermediate persister state induced by  
342 TMZ exposure. Both of these routes were associated with the emergence of TMZ  
343 resistance, as MES cells are assumed to be more resistant to TMZ than PN cells.

344 The methodology was first used to run simulations to explore the influence of the  
 345 parameters on outcome, and to test the efficacy of the use of different dose  
 346 spacings using murine parameters. Murine tumors were simulated without  
 347 treatment (control), and treated with 3 TMZ doses, separated by 1, 4, 7 and 13  
 348 days. Human tumors were simulated without treatment, under standard TMZ  
 349 therapy (6 cycles of TMZ given for 5 days, and resting periods of 3 weeks), and  
 350 under two different courses of TMZ, increasing the spacing between doses. A  
 351 first set of simulations was performed by increasing the rest periods between  
 352 doses from 3 weeks to 9 weeks. Another set of computational studies was run by  
 353 increasing the spacing between individual doses, while removing the rest periods.  
 354 In particular, spacings of 8 and 12 days between doses were considered. Human  
 355 and murine parameters were estimated from previous studies (see Table 1) and  
 356 our own datasets. Virtual human simulations were fed with real patient data<sup>35,36</sup>  
 357 to generate realistic tumors *in silico*.  
 358 The simulator was implemented in Julia (version 1.1.1). Simulation file processing  
 359 and graphics were undertaken in MATLAB (R2021a, MathWorks). Simulations  
 360 were performed on two 2.4 GHz, 16-core, 192 GB memory Mac Pro machines.  
 361 Computational cost per murine simulation ranged from 5 to 10 minutes, while for  
 362 humans, the computational cost ranged from 20 to 50 minutes per simulation.  
 363

| PARAMETER | MEANING                                   | VALUE<br>(MOUSE) | VALUE<br>(HUMAN) | UNITS                | REFERENCE              |
|-----------|-------------------------------------------|------------------|------------------|----------------------|------------------------|
| $\tau_P$  | Division time<br>(proliferative<br>cells) | 19               | 48-72            | h                    | Estimated from<br>[29] |
| $\rho_M$  | Migration<br>coefficient                  | 0.12             | 0.4              | mm <sup>2</sup> /day | Estimated from<br>[29] |

|            |                                                       |               |          |                   |                       |
|------------|-------------------------------------------------------|---------------|----------|-------------------|-----------------------|
| $\tau_D$   | Death time                                            | 100           | 288-312  | h                 | Estimated from [29]   |
| $\mu_{SQ}$ | Transition rate from proliferative state to quiescent | 0.3333-1      | 0.2-0.6  | day <sup>-1</sup> | Estimated from [29]   |
| $\mu_{QS}$ | Transition rate from quiescent state to proliferative | 0.0166-0.1    | 0.03-0.2 | day <sup>-1</sup> | Estimated from [29]   |
| $\mu_{SP}$ | Transition rate from PNs to persister                 | 0.0333        | 0.0333   | min <sup>-1</sup> | Estimated from [27]   |
| $\mu_{PS}$ | Transition rate from persister to PNs                 | 0.2           | 0.2      | day <sup>-1</sup> | Explored in this work |
| $\mu_{PR}$ | Transition rate from persister to MESs                | 0.0111        | 0.0111   | min <sup>-1</sup> | Estimated from [27]   |
| $\mu_{PT}$ | Transition rate from PNs to MESs                      | 0.0208-0.0833 | 0.0208   | h <sup>-1</sup>   | Explored in this work |
| $S_F$      | Survival fraction after TMZ dosing                    | 0.75          | 0.5      | unitless          | Estimated from [38]   |

364

365 **Table 1:** Model parameters used to run murine and human simulations.

366

## 367 RESULTS

368 **Slow growth murine gliomas benefitted from increasing TMZ dose**  
 369 **separation *in silico*.**

370 Virtual murine tumors were simulated as described in Methods, to explore the  
 371 effect of different TMZ schemes in OS and MES content. A sustained increase in  
 372 MES cell abundance was observed in untreated tumors (Figure 1A), reproducing  
 373 the aforementioned PN-MES transition. These values are in agreement with real

374 mouse data obtained in *in-vivo* experiments performed in this study. Notably, the  
375 tumor boundary was specially enriched in MES cells (Figure 1B).  
376 Treatment with TMZ yielded an increase in OS for both fast- and slow-growth  
377 tumors (Figure 1C). This survival increase was higher for slow-growth tumors;  
378 moreover, enlarging the spacing between doses produced a better response in  
379 this kind of tumors. Regarding resistance, TMZ induced a significant increase in  
380 MES cell content in fast-growth tumors (Figure 1D). However, slow-growth  
381 tumors did not undergo such increase; most of them remained with the same  
382 amount of MES cells as control tumors, or even reduced their MES levels. This  
383 effect was more evident for long spacings.  
384 A robust observation was that virtual mice with slow-growth murine tumors had  
385 the largest survival increase when increasing the spacing between doses *in silico*.  
386 This benefit was preserved through the regions of the parameter space explored.  
387 Longer spacing between doses led to reduced mesenchymal component in the  
388 final tumors as compared to the 1-day spacing. Altogether, the simulations  
389 suggest that longer spacing between doses would be more effective against slow-  
390 growth gliomas, both in terms of OS and resistance development (Figures 1C-  
391 1D).

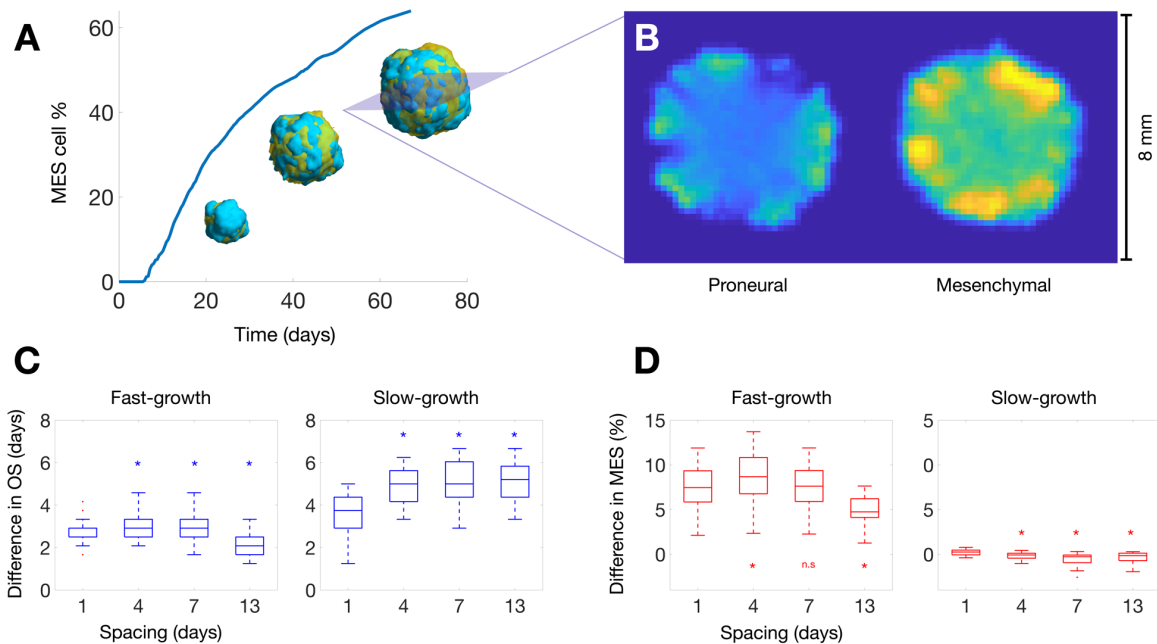

392

393 **Fig. 1.** Mice tumor simulations predict an improvement in antitumor effect of TMZ  
 394 in slow-growth GBMs. **(A)** Depiction of PN-MES transition in a single simulation,  
 395 showing the evolution of MES cell abundance over time. 3D volumes are  
 396 rendered at 50, 75 and 100% of simulation time (blue: PN cells; orange: MES  
 397 cells). **(B)** Axial plane showing cell number per voxel in a simulated tumor at the  
 398 end of simulation. Both PN and MES cell numbers belong to the same slice. **(C)**  
 399 OS gain (in days) produced by TMZ dose spacing compared against control. 4-,  
 400 7- and 13-day spacings were compared against 1 day spacing (Wilcoxon signed-  
 401 rank test). **(D)** MES cell increase (percentage) compared against control. 4-, 7-  
 402 and 13-day spacings were compared against 1 day spacing (Wilcoxon signed-  
 403 rank test, \*P <= 0.05, n.s.=non-significant).

404

405 **Effect of protracted TMZ in two mouse glioma models with different**  
 406 **proliferation kinetics.**

407 To validate the hypothesis that protracted TMZ regimes could offer therapeutic  
 408 advantages depending on the degree of proliferation of glioma cells, mouse  
 409 models were used, generated in our lab by overexpressing EGFRwt or EGFRvIII  
 410 in p16/p19 ko subventricular zone (SVZ) progenitors. Both models generate  
 411 gliomas in nude mice with a high penetrance and reproducibility. Notably, animals

412 survive for two months after SVZ-EGFRwt cell intracranial injection, whereas  
413 SVZ-EGFRvIII tumors kill the animals much faster<sup>31</sup>, in agreement with the higher  
414 aggressiveness attributed to the mutated isoforms of EGFR<sup>40,41</sup>. Moreover, our  
415 previous analyses showed that tumors formed by SVZ-EGFRvIII cells were much  
416 more proliferative than those formed by SVZ-EGFRwt cells<sup>31</sup>.

417 Standard treatment of mouse glioma models with TMZ consisted of daily (5  
418 days/week) i.p. injections of 10 mg/kg/day of the compound, which did not  
419 produce a survival benefit in animals bearing SVZ-EGFRwt or SVZ-EGFRvIII  
420 tumors (Figure 2A). Several TMZ regimes were then designed with three  
421 consecutive doses of three TMZ injections, separated by 1 day (X+1), 4 days  
422 (X+4), 7 days (X+7) or 13 days (X+13) (Figure 2B), although this last schedule  
423 could not be applied in the EGFRvIII model due to their faster growth. The graphs  
424 in Figure 2C show a clear reduction in SVZ-EGFRwt tumor growth in the X+7 and  
425 X+13 protracted schemes. Extending the interval between TMZ doses did not  
426 improve the response of SVZ-EGFRvIII bearing animals (Figure 2D). This result  
427 shows the truth (at least in mice) of the suggestion from the mathematical model  
428 that slowly-growing tumors are those that most benefit from protracted regimes.



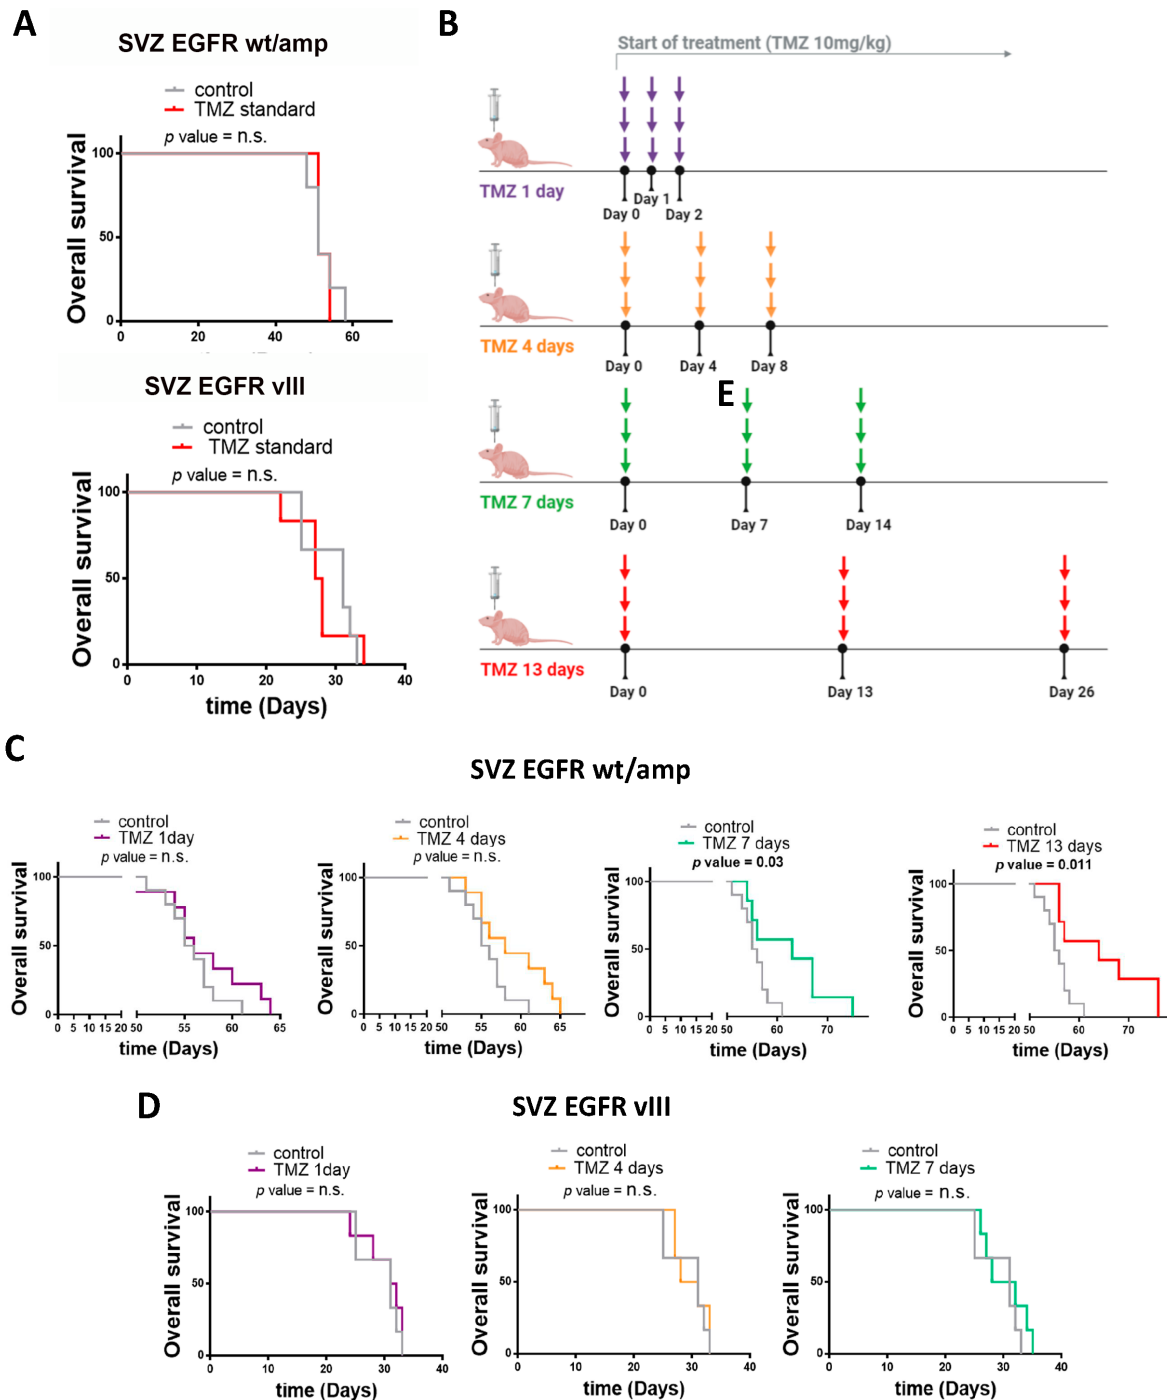

429

430 **Fig. 2.** Increasing spacing between TMZ doses improves the anti-tumor effect of  
 431 TMZ in the SVZ-EGFR wt/amp (lower growth rate) but not in the SVZ EGFR vIII  
 432 (faster growth speed) model. (A) Kaplan-Meier overall survival curves of mice that  
 433 were orthotopically injected with SVZ EGFR wt/amp (top) or SVZ EGFR vIII  
 434 (bottom) cells and subsequently treated with intraperitoneal injections (five days  
 435 per week) of temozolomide (TMZ) (10 mg/kg per day) ( $n = 6$ ). (B) Representative  
 436 scheme of the different TMZ schedules studied. (C-D) Kaplan-Meier overall

437 survival curves of mice that were orthotopically injected with SVZ EGFR wt/amp  
438 (n = 9) (C) or SVZ EGFR vIII (n = 6) (D) cells and subsequently treated with  
439 intraperitoneal injections of TMZ (10 mg/kg per day) following the different  
440 treatment protocols explained in (B), each of them represented by its assigned  
441 color.

442

443 **Increasing spacing between TMZ doses does not increase cell death in the**  
444 **tumors but reduces the expression of persister-related genes.**

445 To understand the beneficial effect of PTS, tumor tissue in the SVZ-EGFRwt  
446 model was analyzed, comparing the control-treated with the X+4 (no response)  
447 and the X+13 (responsive) tumors. Notably, no changes were found in the tumor  
448 size in any of the schemes (Supplementary Figure 1A). In the X+13 scheme, a  
449 small decrease was observed in the number of proliferating cells (Supplementary  
450 Figure 1B), with no increase in the number of apoptotic cells (Figure 3A)  
451 compared to control tumors. However, in the X+4 scheme there was no change  
452 in proliferation, whereas an increase in the number of apoptotic cells was  
453 measured (Supplementary Figure 1C). These results suggest that the reduction  
454 in the tumor growth observed after X+13 protracted administration of TMZ is not  
455 mediated by an increase in the cell death response.

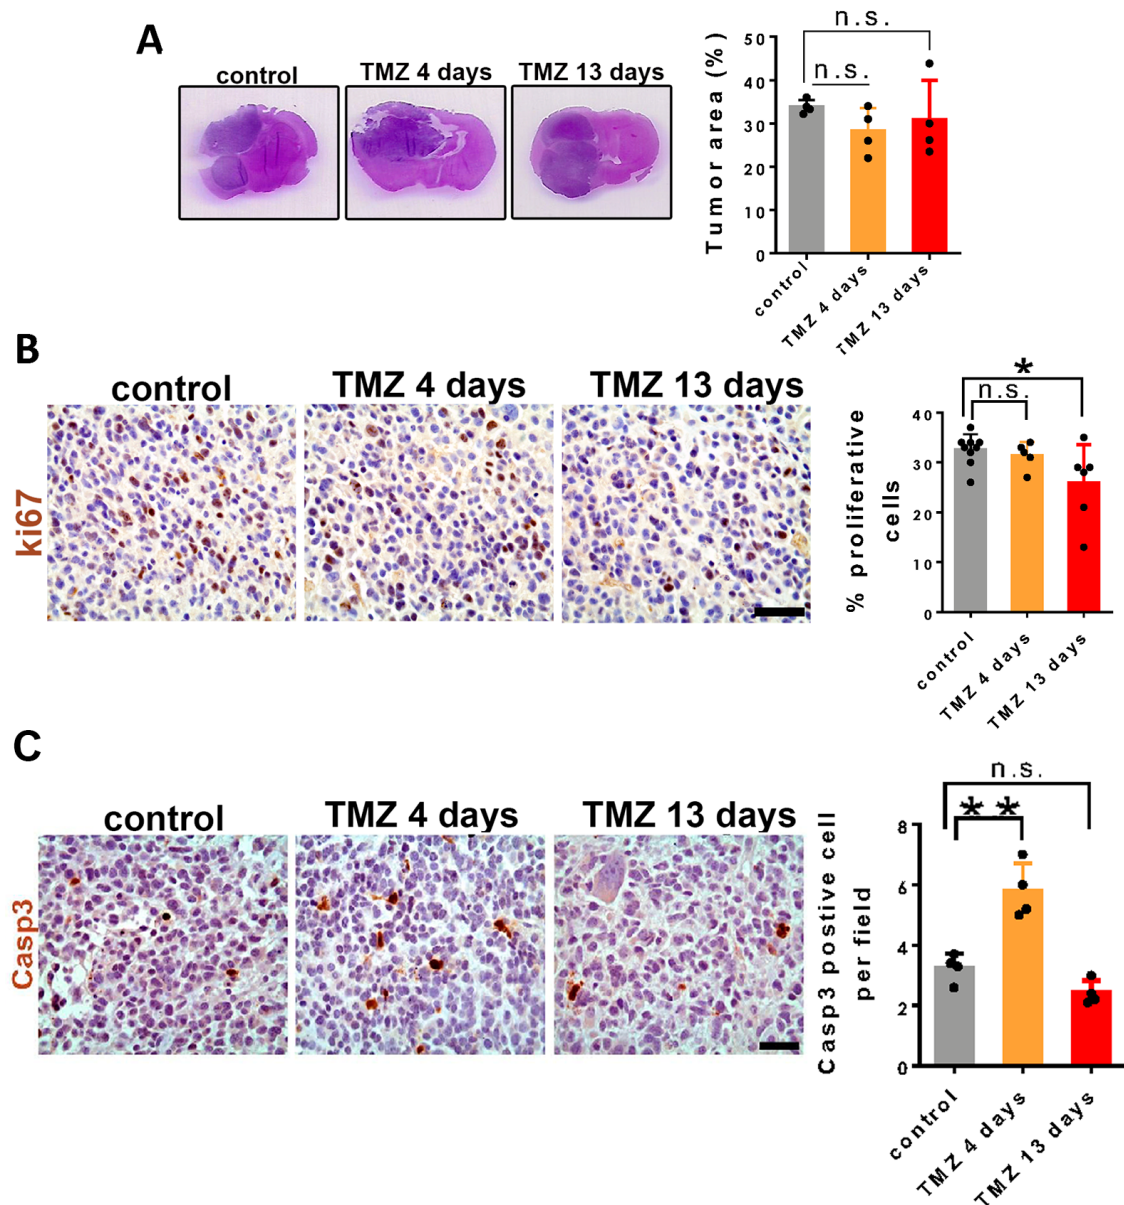

456

457 **Supplementary Fig. 1** Effect of increasing spacing between TMZ doses in SVZ  
 458 EGFR wt/amp tumors. (A) Representative histological images stained with  
 459 hematoxylin and eosin (H&E) from coronal brain sections of SVZ EGFR wt/amp  
 460 tumors from (Fig. 2) of control, TMZ 4 days and TMZ 13 days treatment condition.  
 461 Quantification of tumor area percentage is shown on the right (n=3). (B)  
 462 Representative pictures of immunohistochemical (IHC) staining of ki67 in the  
 463 same tumors from (A) and quantification of the percentage of proliferative cells  
 464 on the right (n=3). (C) Representative pictures of IHC staining of Active Caspase3  
 465 in SVZ EGFR wt/amp in the same tumors from (A). Quantification is shown on  
 466 the right (n=3). \* $P \leq 0.05$ , n.s.=non significant.

467

468 As previously mentioned, persister cells represent an intermediate phenotype  
469 arising before the development of TMZ resistance in gliomas<sup>29</sup>. To test whether  
470 different modalities of protracted TMZ treatment could affect the appearance of  
471 these population of cells, the expression of persister genes was analyzed.  
472 Notably, the expression of these markers was induced in tumors that had been  
473 treated with the X+4, but not with the X+13, regime, as compared to untreated  
474 animals (Figure 3A). Interestingly, one of these genes is *MGMT*, whose  
475 expression is strongly associated with TMZ resistance<sup>42</sup>. It was confirmed that  
476 *MGMT* protein was indeed being accumulated in the X+4 but not in the X+13  
477 scheme (Figure 3B). These results suggest that extending the rest periods  
478 between TMZ treatments not only improved the anti-tumor effect of the drug, but  
479 also reduced the appearance of a persister state in the glioma cells.

480 In order to test whether the effect of protracted TMZ was cell-autonomous, SVZ-  
481 EGFRwt cells were treated with different schedules of TMZ *in vitro*. An increase  
482 was observed in caspase 3 cleavage in the X+3 scheme (Figure 3C),  
483 accompanied by the accumulation of the expression of persister genes, including  
484 *MGMT* (Figure 3D). Notably, an extended period between TMZ doses (X+7  
485 scheme) did not produce a significant increase in Caspase 3 (Figure 3C) or in the  
486 expression of persister genes (Figure 3D). These results suggest that the anti-  
487 tumor mechanism of protracted TMZ doses is the same *in vivo* and *in vitro* and  
488 does not depend on the tumor microenvironment.

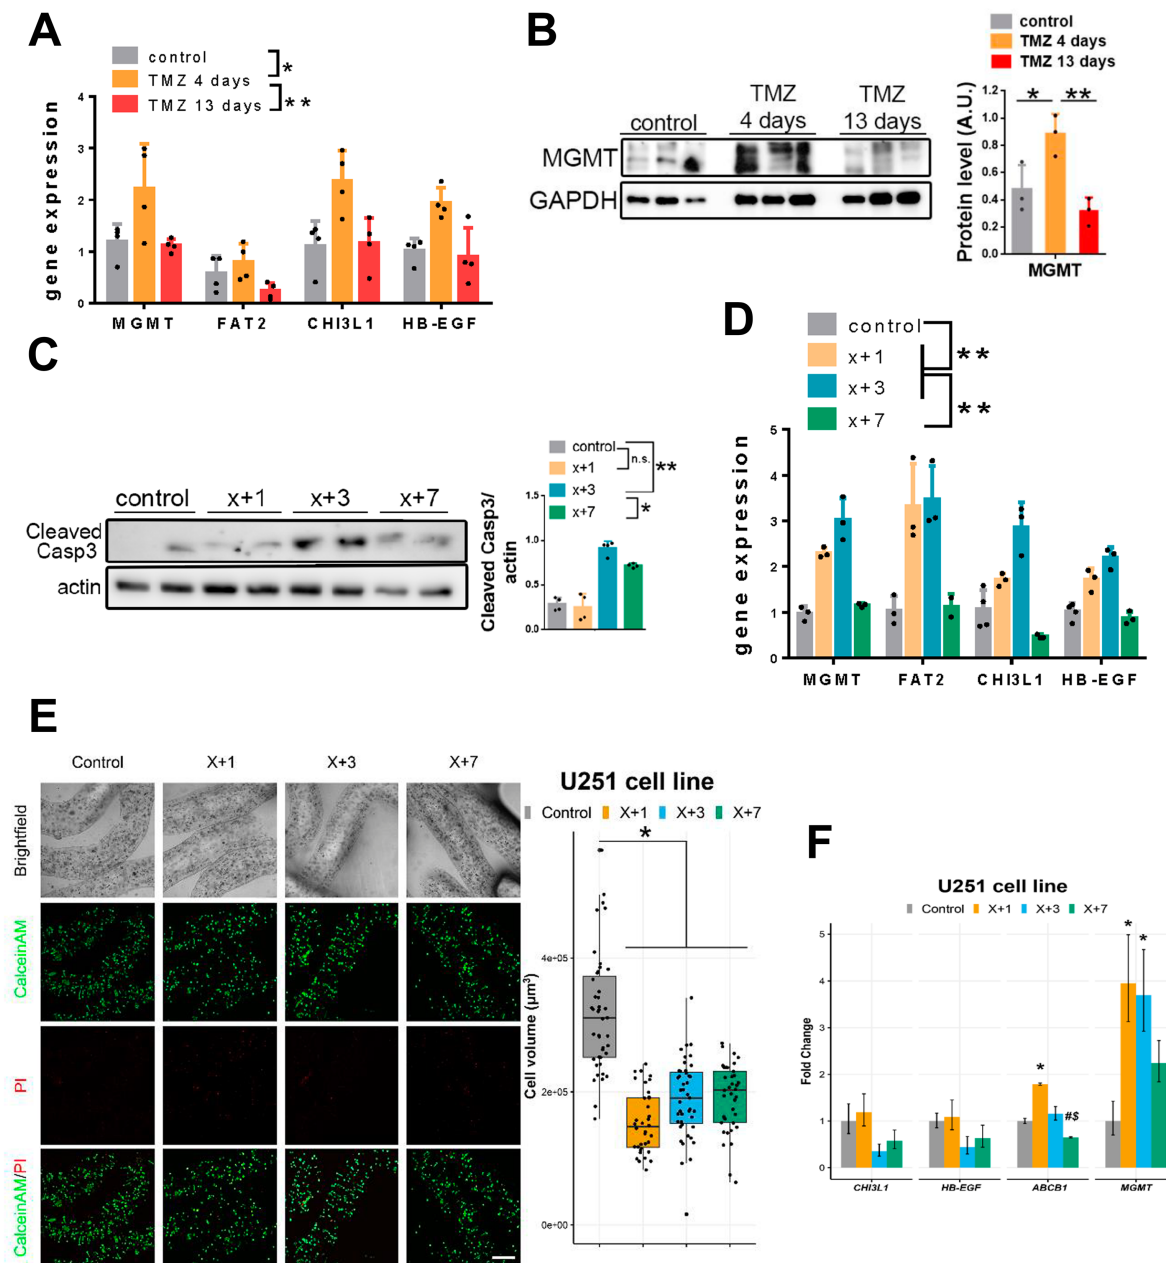

489

490 **Fig. 3** Increasing the spacing between TMZ treatments reduces the expression of  
 491 persister-related genes *in vivo* and *in vitro*. (A) qRT-PCR analysis of persister-  
 492 related genes in SVZ EGFR wt/amp tumors from (Fig. 2). *Actin* was used for  
 493 normalization (n=4). (B) Western blot (WB) analysis and quantification of the  
 494 expression of MGMT in SVZ tumors from (A). GAPDH was used for  
 495 normalization. (C) WB analysis and quantification of Active Caspase3 in SVZ  
 496 EGFR wt/amp cells treated *in vitro* with different TMZ schedules: control, TMZ 1  
 497 day, TMZ 3 days and TMZ 7 days. *Actin* was used for normalization. (D) qRT-  
 498 PCR analysis in SVZ EGFR wt/amp cells with the different treatment protocols.

499 *Actin* was used for normalization (n=4). (E) Representative confocal microscopy  
500 images of U251 cells LIVE/DEAD labeled with CalceinAM/PI in alginate  
501 microfibers after 28 days when the treatments and cultivation of cells were  
502 completed. Quantification is shown as a box-plot on the right (n ≥ 3) Scale bar =  
503 300 μm. (F) Relative gene expression levels of persister-related genes. *ACTB*  
504 was used for normalization (n = 3). \*P ≤ 0.05, \*\*P ≤ 0.01, n.s.=non significant. #  
505 indicates P<0.05 statistical difference compared to corresponding X+1  
506 treatments. \$ indicates P<0.05 statistical difference compared to corresponding  
507 X+3 treatments.

508

509 To confirm these results in human cells, U251 cells, grown in conventional 2D  
510 conditions, were exposed to three doses of TMZ (100 μM), comparing daily (X+1)  
511 and 3-day (X+3) schedules (Supplementary Figure 2A). Both regimes were able  
512 to reduce the growth of the cells compared to the control, according to the change  
513 in doubling time (Supplementary Figure 2B). However, in both cases an increase  
514 in the expression of resistance-related markers in the TMZ treated cells was  
515 detected (Supplementary Figure 2C). It was therefore determined to test the  
516 effect of PTS in conditions where the cells would have slower growth. For this  
517 purpose, U251 cells were immobilized in alginate microfibers and grown them in  
518 3D conditions. The cells were then exposed to three doses of TMZ (100 μM),  
519 comparing daily (X+1), 3-day (X+3) and 7-day (X+7) schedules (Figure 3E). In all  
520 cases, TMZ reduced the growth of the cells (Figure 3F). Notably, X+7 decreased  
521 the expression of persisters-related genes (*CHI3L1*, *HB-EGF*, and *ABCB1*) in  
522 TMZ treated cells (Figure 3F). These results suggest that enlarging the intervals  
523 between doses could reduce the appearance of a persister phenotype *in vitro* in  
524 human glioma cells, at least in conditions of reduced proliferation.



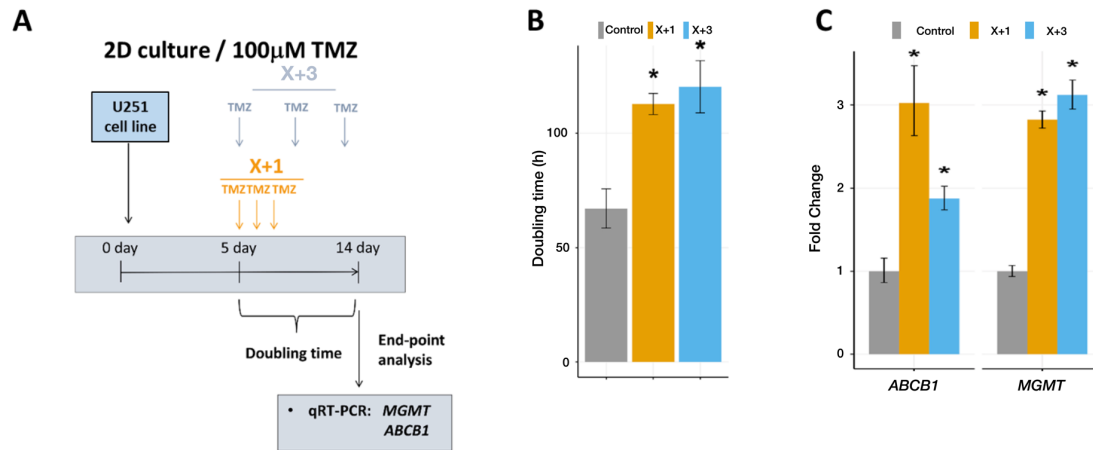

525

526 **Supplementary Fig. 2** Effect of TMZ *in vitro* in 2D cultures. (A) TMZ treatment  
527 scheme in long-term 2D cell cultures of U251 glioblastoma cell line. (B) Doubling  
528 Time (dt) calculated using RTCA 1.2.1 software illustrates the anti-proliferative  
529 effects of TMZ treatments in U87 cell line. (C) Relative gene expression levels of  
530 *ABCB1* and *MGMT* in U251 cells obtained by qRT-PCR. All values are expressed  
531 as mean  $\pm$  SD and *ACTB* was used for normalization (n = 3).

532

533 **Protracted TMZ induced a change in the phenotype of slowly-proliferating**  
534 **gliomas, mediated by epigenetic changes.**

535 Our previous characterization of the SVZ-EGFRwt model shows that these cells  
536 express MES features<sup>30,31</sup>. Interestingly, an *in-silico* analysis of two proliferation  
537 markers, PCNA and MKI67, was performed, and it was found that MES gliomas  
538 expressed the lowest levels of these genes (Supplementary Figure 3A),  
539 suggesting that tumors with this phenotype are less proliferative than the other  
540 two subtypes (classical (CL) and PN).

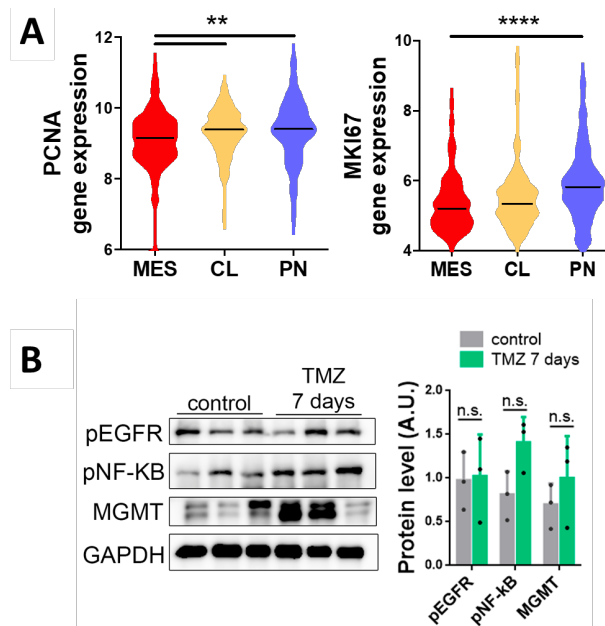

541

542 **Supplementary Fig. 3.** Expression of proliferation-related markers in different  
543 subgroups of gliomas. (A) RNA-seq analysis of *PCNA* (left) and *MKI67* (right) in  
544 a TCGA cohort stratified in to three groups: mesenchymal (MES), classical (CL)  
545 and proneural (PN) tumors. (B) Western blot analysis of phosphorylated EGFR  
546 (pEGFR) and NF-kB (p65) (pNF-kB) in SVZ-EGFRvIII tumors from Fig. 2.  
547 GAPDH was used as a loading control. Quantification is shown on the right (n=  
548 3).

549

550 It has previously been shown that the MES profile of SVZ-EGFRwt tumors  
551 depends on the activation of the EGFR/NFkB signaling pathway. Notably, EGFR  
552 has been associated with TMZ resistance in gliomas<sup>43</sup>. The activation status of  
553 this receptor in SVZ-EGFRwt tumors treated with TMZ was therefore explored,  
554 both in responsive and non-responsive schedules. A clear downregulation of the  
555 levels of phosphorylation of EGFR and NF-kB was observed in the X+13 tumors  
556 (Figure 4A). In tumors from the X+4 regime there was an increase in phospho-  
557 EGFR, although no significant changes were observed in the amount of phospho-  
558 NFkB (Figure 4A), a MES driver in gliomas<sup>39</sup>. The changes observed in the X+13  
559 responsive tumors were paralleled by an increase in the expression of several



560 PN markers (Figure 4B) and the downregulation of the transcription of MES  
561 genes (Figure 4C), compared to control tumors. These results suggest that less  
562 intensive TMZ schedules might be reducing the aggressiveness of gliomas by  
563 inducing a MES to PN phenotypic change. Notably, no changes in the amount of  
564 phosphorylation of EGFR or NF- $\kappa$ B were observed in TMZ-treated SVZ-EGFRvIII  
565 tumors compared to controls (Supplementary Figure 3A), reinforcing the lack of  
566 response of these gliomas to the drug.

567 To study the anti-tumor mechanisms of TMZ more deeply, SVZ-EGFRwt cells  
568 were incubated *in vitro* in the presence of TMZ (25  $\mu$ M) for 8 days. As noticed in  
569 tumors treated with TMZ, an increase in the expression of PN markers was  
570 observed (Figure 4D). Notably, this effect was reverted in the presence of the  
571 DNA-methyltransferase inhibitor 5-aza-2'deoxyctidine (AZA) (Figure 4D),  
572 suggesting that TMZ might be inducing the expression of these genes by a shift  
573 in the DNA methylation pattern, previously proposed as a mechanism of action  
574 of this drug in glioma cells<sup>44</sup>. A decrease in the expression of MES genes was  
575 also noticed, which did not occur in the presence of AZA (Figure 4E). Therefore,  
576 it was hypothesized that the anti-tumor effect of protracted schemes of TMZ might  
577 be mediated, at least in part, by a MES-to-PN transition of the tumor cells induced  
578 by epigenetic changes, the opposite of what would normally happen during tumor  
579 progression<sup>45</sup>. This would increase the effect of giving more time to persister cells  
580 to revert their phenotypes to the PN phenotype.

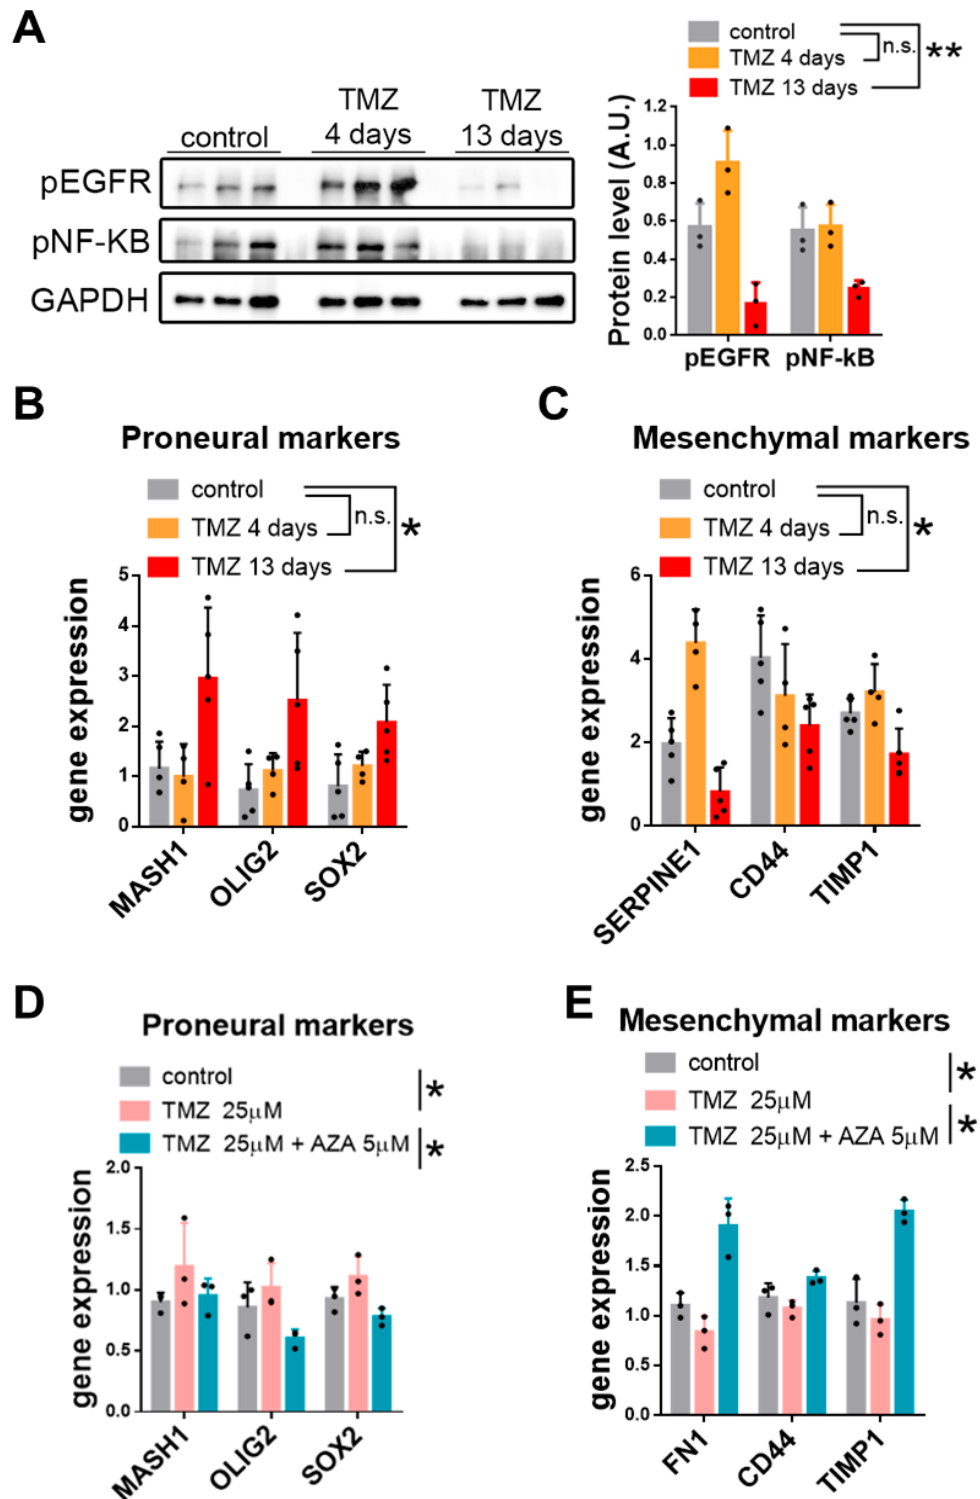

581  
582

583 **Fig. 4.** Mechanistic studies. Change of glioma phenotype for different TMZ  
584 treatment schedules. (A) Western blot analysis and quantification of  
585 phosphorylated EGFR (pEGFR) and NF-kB (p65) (pNF-kB) in SVZ EGFR wt/amp  
586 tumors from (Fig. 2). GAPDH was used as a loading control (n= 3). (B-C) qRT-  
587 PCR analysis of Proneural (B) and Mesenchymal subtype (C) related genes in

588 SVZ EGFR wt/amp tumors from (A). *Actin* was used for normalization (n=4). (D-  
589 E) Analysis of the expression of Proneural (D) and Mesenchymal markers (E)  
590 transcription by qRT-PCR in SVZ EGFR wt/amp cells cultured in the presence of  
591 25  $\mu$ M TMZ, with or without azacytidine (AZA) (5  $\mu$ M). *Actin* was used for  
592 normalization (n= 3). \*P  $\leq$  0.05, \*\*P  $\leq$  0.01, n.s.=non significant.

593

594

595 **TMZ dose can be increased in a protracted scheme to enhance the anti-**  
596 **tumor effect and reduce toxicity.**

597 One of the potential benefits of long spacing between TMZ cycles could be a  
598 reduction in the toxicity of the drug, which may perhaps allow the CT dose to be  
599 increased. To test this hypothesis, the amount of TMZ administered to the  
600 animals after the intracranial injection of SVZ-EGFRwt cells was increased to  
601 50mg/Kg/day. The same schemes for TMZ treatment were used as in Figure 2,  
602 and confirmed that the longest period between cycles was the most effective in  
603 reducing tumor growth (Figure 5A). The day after the last TMZ cycle, blood was  
604 collected from the animals to perform a white-cell count. One of the most common  
605 adverse effects of chemotherapy with TMZ is myelosuppression, including  
606 thrombocytopenia and leukopenia<sup>46</sup>. Indeed, a reduction was observed in all the  
607 numbers in the X+1 regime that reached a statistically significant value for the  
608 decrease in thrombocytes (Figure 5B). Notably, extending the period between  
609 doses was able to revert to normal the leukocyte and thrombocyte counts (Figure  
610 5B), indicating that the toxicity of TMZ was reduced, even though the anti-tumor  
611 effect was increased in comparison to the lower dose regime.

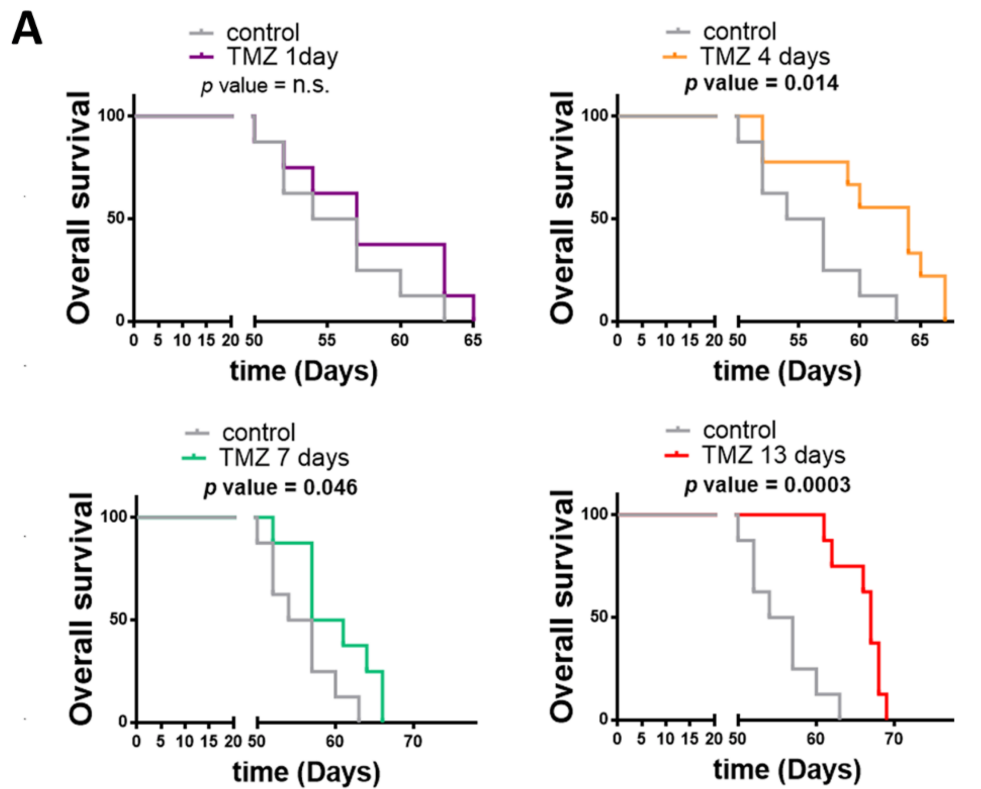

**B**

|                                  | TMZ (50mg/kg)       |                        |                   |                     |
|----------------------------------|---------------------|------------------------|-------------------|---------------------|
|                                  | Untreated           | 1 day                  | 7 days            | 13 days             |
| <i>Hematology</i>                |                     |                        |                   |                     |
| Leukocytes ( $\times 10^9/L$ )   | 5,12 $\pm$ 2,50     | 4 $\pm$ 3,68           | 5,1 $\pm$ 3,29    | 5,4 $\pm$ 1,59      |
| Neutrophiles ( $\times 10^9/L$ ) | 3,45 $\pm$ 1,63     | 2,65 $\pm$ 2,26        | 3,85 $\pm$ 2,89   | 3,57 $\pm$ 1,21     |
| Lymphocytes ( $\times 10^9/L$ )  | 1,03 $\pm$ 0,6      | 0,78 $\pm$ 0,83        | 0,78 $\pm$ 0,38   | 1,18 $\pm$ 0,64     |
| Trombocytes ( $\times 10^9/L$ )  | 426,75 $\pm$ 172,57 | 131,25 $\pm$ 91,94 (L) | 339,5 $\pm$ 283,6 | 349,25 $\pm$ 195,22 |

612

613 **Fig. 5** Reduced toxicity of protracted TMZ schemes. (A) Kaplan-Meier overall  
 614 survival curves of mice that were orthotopically injected with SVZ EGFR wt/amp  
 615 cells and subsequently treated with intraperitoneal injections of a higher dose of  
 616 TMZ (50 mg/kg per day) following the different TMZ protracted schemes (n = 9).  
 617 (B) Hematology results in mouse blood samples from (A).

618

619

620

621

622

623

624 **Virtual clinical trials suggest how to translate the results in experimental**  
625 **models to human patients**

626 To extend previous *in vivo* findings, many sets of virtual clinical trials were  
627 performed, based on the mathematical model with human parameters. The  
628 potential effect of PTS on tumor growth dynamics was assessed by (i) enlarging  
629 the rest periods between cycles, and (ii) testing long separation times between  
630 individual doses without rest periods (Figure 6). Simulated tumors were  
631 separated in slowly-growing and fast-growing GBMs. All *in-silico* patients were  
632 given 30, 60 or 90 doses of TMZ 7 weeks after diagnosis (depending on therapy  
633 regime).

634 Standard TMZ schemes (5 consecutive doses, rest period of 3 weeks) showed a  
635 beneficial effect in terms of survival for both tumor types (Fig. 6A, 6B), with a  
636 median survival difference of nearly 2 months, in line with clinical experience<sup>12</sup>.  
637 Increasing the rest period to 9 weeks improved survival for slow-growth tumors,  
638 with an increased number of longer survivors (Fig. 6C). Fast-growing tumors did  
639 not benefit from the increase in spacing between doses (Fig. 6D), in line with our  
640 observations in animal models.

641 On the other hand, all trial branches benefited from increasing time intervals  
642 between doses (without resting periods), both for slow and fast-growing tumors.  
643 As the number of cycles given was increased, differences in median survival  
644 increased remarkably.

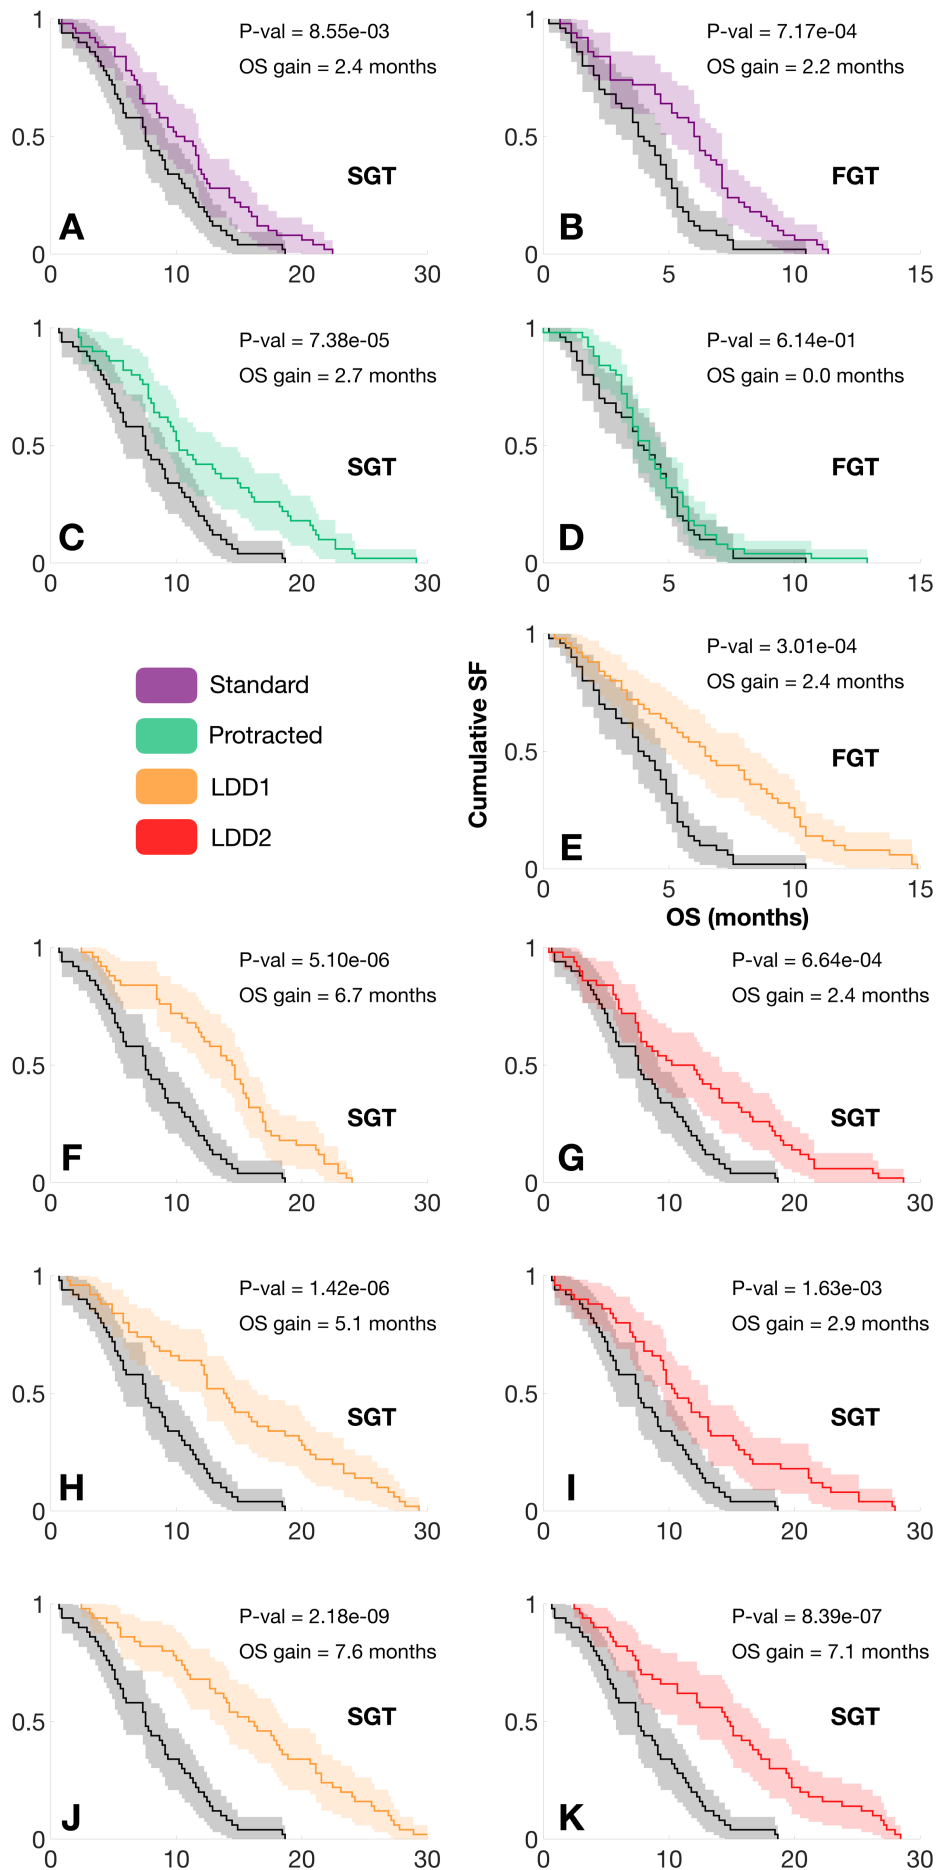

646 **Fig. 6. Kaplan-Meier survival curves for PTS *in silico*.** Standard therapy (red)  
647 consists of 6 cycles of TMZ, with 5 doses per cycle, and 23 days of resting period.  
648 Protracted therapy (green) consisted of standard therapy, with a resting period of  
649 9 weeks. Therapies with long spacing between doses 1 (LDD1, orange)  
650 correspond to doses separated by 8 days without any rest periods. Therapies  
651 with long spacing between doses 2 (LDD2, red) consisted of individual doses  
652 spaced by 12 days without rest periods. **A)** Slow-growing simulated tumors with  
653 6 cycles of standard therapy. **B)** Fast-growing simulated tumors with 6 cycles of  
654 standard therapy. **C)** Slow-growing simulated tumors with 6 cycles of protracted  
655 therapy. **D)** Fast-growing simulated tumors with 6 cycles of protracted therapy.  
656 **E)** Fast-growing simulated tumors with 6 cycles of LDD1 therapy. **F)** Slow-  
657 growing simulated tumors with 6 cycles of LDD1 therapy. **G)** Slow-growing  
658 simulated tumors with 6 cycles of LDD2 therapy. **H)** Slow-growing simulated  
659 tumors with 12 cycles of LDD1 therapy. **I)** Slow-growing simulated tumors with 18  
660 cycles of LDD1 therapy. **J)** Slow-growing simulated tumors with 12 cycles of  
661 LDD2 therapy. **K)** Slow-growing simulated tumors with 18 cycles of LDD2  
662 therapy.

663

## 664 **DISCUSSION**

665 TMZ is the standard of care for newly diagnosed GBM, but the effect of this  
666 alkylating agent is schedule-dependent<sup>47</sup>. Genetic or acquired resistances to  
667 TMZ can easily develop, and a strict regimen must be followed for a favorable  
668 result to be obtained<sup>48,49</sup>. The design of cytotoxic chemotherapy (CT) and  
669 radiation therapy schedules is typically based on the basic principle of delivering  
670 the maximum tolerated dose in the minimum time possible (MTDMT). The  
671 rationale behind this is to avoid potential tumor repopulation during treatment, or  
672 in the periods without treatment, and thus to achieve low tumor-cell numbers  
673 compatible with patient cure. Although this is certainly the way to go when CT is  
674 intended as a curative treatment, it is not obvious that it would be the best strategy  
675 when it is known that treatment can only control disease for a limited time.

676

677 Intensification of TMZ delivery schemes has been studied for either newly  
678 diagnosed<sup>31</sup> or recurrent<sup>32,33</sup> high-grade gliomas without positive results on OS  
679 and with increased toxicity<sup>38</sup>. However, no previous studies have considered  
680 effective dose-reduction schemes with longer time spacing between treatments.  
681 Different studies based on mathematical models have argued that cytotoxic  
682 therapies with larger time intervals between doses could provide survival  
683 benefits. However, these mathematical models are based on saturable growth  
684 models, where tumors proliferate less on average as they grow larger, and the  
685 phenomenon is lost when exponential growth models are considered<sup>21</sup>. The  
686 situation would be worse in the context of super-exponential growth models<sup>22</sup>  
687 where the opposite result would be obtained, i.e. survival benefits from the  
688 MTDMT approach.

689 This work studies, *in vitro*, *in vivo* and *in silico* using mathematical models, the  
690 main factor limiting the effectiveness of treatment in gliomas: the development of  
691 resistance. Resistance acquisition in the mathematical model was assumed to be  
692 due to two biological facts: PN-MES transition, and persister induction by TMZ.  
693 Accounting for resistances in our stochastic mesoscopic discrete simulation  
694 model led to improved survival and reduced resistance when increasing the  
695 interval between doses in virtual mice. The reduction of resistant cells stemmed  
696 from the fact that longer spacing between doses allowed persister cells to revert  
697 their phenotypes to PN. Clearly, when persistence time is longer than the spacing  
698 between doses, persister cells receive additional TMZ doses and the emergence  
699 of resistance is triggered. Very interestingly, for slowly-growing tumors, as TMZ  
700 kills a fraction of both PN and MES cells, the resistance level at the end of the



701 simulation was observed to be smaller than its control counterpart, as the  
702 spontaneous PN-MES transition is being reduced due to TMZ killing PN cells.  
703 Thus, increasing the spacing between doses provides the same effect as a  
704 reverse MES-PN transition. This setup was translated to the real world, both in *in*  
705 *vitro* and *in vivo*. Results in mice were in accordance with model suggestions:  
706 slow-growing tumors benefited most from PTS. In fact, fast-growing tumors did  
707 not show an improvement in OS, as expected.

708 A phenotypic change in slowly-growing tumors subject to increased spacing  
709 between doses was observed *in vivo*, with a reduction in the levels of  
710 phosphorylated EGFR and NF- $\kappa$ B, s associated with a MES-to-PN switch, as  
711 recently shown<sup>30</sup>. This transition could explain the reduced aggressiveness of the  
712 tumors after long-cycle TMZ treatment, which does not seem to depend on  
713 changes in proliferation and/or survival of tumor cells. Notably, our data suggest  
714 that this MES to PN switch does not depend on the tumor microenvironment and  
715 can be reverted in the presence of AZA, the known epigenetic regulator. Changes  
716 in DNA methylation has already been associated with the response to TMZ in a  
717 time and dose-dependent manner<sup>44</sup>. Moreover, it has been previously shown that  
718 the persister state is also linked with alterations in the levels of histone acetylation  
719 and with chromatin remodeling processes<sup>29</sup>. Therefore, it could be hypothesized  
720 that epigenetic changes might be responsible for the appearance of resistances,  
721 but also for some of the anti-tumor effects of TMZ, all linked to alterations in the  
722 transcriptomic profiles of GBMs. Furthermore, our results might explain why  
723 extensive TMZ treatment did not alter the survival of PN gliomas, but was  
724 beneficial for the more aggressive MES subtype<sup>50</sup>. Anyhow, these results not only  
725 emphasize the potential clinical relevance of PTS for slowly-growing GBMs, but

726 also indicate that the biological assumptions taken in the model of action of this  
727 compound are not far-fetched, and should be explored in deeper detail to keep  
728 improving our knowledge about GBMs and the best way to treat them.

729 The experimental evidence shown here supports the fact that PTS could be  
730 beneficial for GBM patients in terms of survival, resistance and toxicity so far. To  
731 gain some insight into the improvements that could be expected in human  
732 patients, many virtual trials were performed based on the mathematical model, to  
733 explore the consequences PTS in clinical scenarios. The aim was to provide a  
734 broad exploration of the outcomes of protracted regimes, and a proof of concept  
735 that, if taken with caution, may be helpful in guiding the design of future clinical  
736 trials.

737 The output yield by the virtual clinical trial was in agreement with the experimental  
738 results obtained in this work. Standard TMZ therapy showed a moderate  
739 improvement in terms of survival, in line with clinical experience. Fast-growing  
740 tumors did not benefit from increasing the rest periods between cycles, but they  
741 did benefit from enlarging the spacing between doses. Slow-growing tumors  
742 benefitted not only from every alternative therapy scheme, but also from an  
743 increase in the number of cycles given due to the reduction in the MES  
744 component, and thus in tumor resistance. This points to alternative schemes that  
745 would allow for more TMZ doses to be given, while keeping resistances stable  
746 and with lower toxicity. There were several interesting implications from these  
747 virtual trial studies. The first was that extending the rest period between 5-dose  
748 cycles from 3 to 9 weeks showed a significant improvement in survival for patients  
749 with slow-growing GBMs, suggesting an easy-to-apply upgrade in the standard  
750 of care. The second was that there may be room for optimizing TMZ schedules

751 in GBMs, as the best improvements in survival came from schemes without rest  
752 periods, and 8-12 days between doses. Due to their lower dose density, these  
753 schemes could be less harmful in terms of toxicity and, following both virtual and  
754 experimental results, a reduced resistance should also be expected, making  
755 them an alternative option for clinical implementation.

756 In conclusion, our combination of *in-silico* simulations, *in-vitro* and *in-vivo* studies  
757 showed that TMZ administration schedules with increased time spacing between  
758 doses may reduce toxicity, delay the appearance of resistances and lead to  
759 survival benefits mediated by changes in the tumor phenotype, which was  
760 especially important for slowly growing gliomas. The experimental results were  
761 extended to human patients showing different ways to improve survival based on  
762 the same concept.

763

## 764 **ACKNOWLEDGMENTS**

765 This work has been supported by the James S. Mc. Donnell Foundation (USA)  
766 21st Century Science Initiative in Mathematical and Complex Systems  
767 Approaches for Brain Cancer (Collaborative award 220020560); Ministry of  
768 Education, Science and Technological Development, Republic of Serbia (ref.  
769 number 451-03-9/2021-14/200007); Ministerio de Ciencia e Innovación, Spain  
770 (grant number PID2019-110895RB-I00). JJ-S is supported by the University of  
771 Castilla-La Mancha under fellowship grant number 2020-PREDUCLM-15634. We  
772 thank Luis Enrique Ayala-Hernández and Juan Belmonte-Beitia for their  
773 thoughtful discussions regarding continuous mathematical descriptions of GBM  
774 growth and response to TMZ, Julián Pérez-Beteta for providing us real patient  
775 data required to parametrize the discrete model, as well as Sofija Jovanović

776 Stojanov and Ana Podolski-Renić for their valuable assistance in performing and  
 777 analyzing results in human glioblastoma 2D and 3D cell culture.  
 778

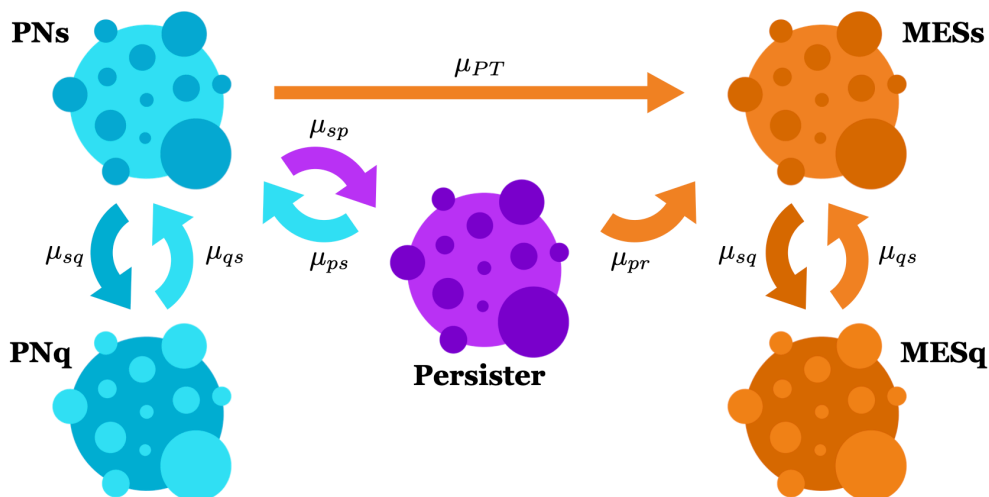

779  
 780 **Supplementary Fig. S4.** Allowed cell transitions in the model. Both PN and MES  
 781 cells share the same proliferative-quiescent dynamics. PNs can become MES  
 782 either directly or due to TMZ exposure. In the latter case, the transition occurs  
 783 through a transient reversible persister state.  
 784

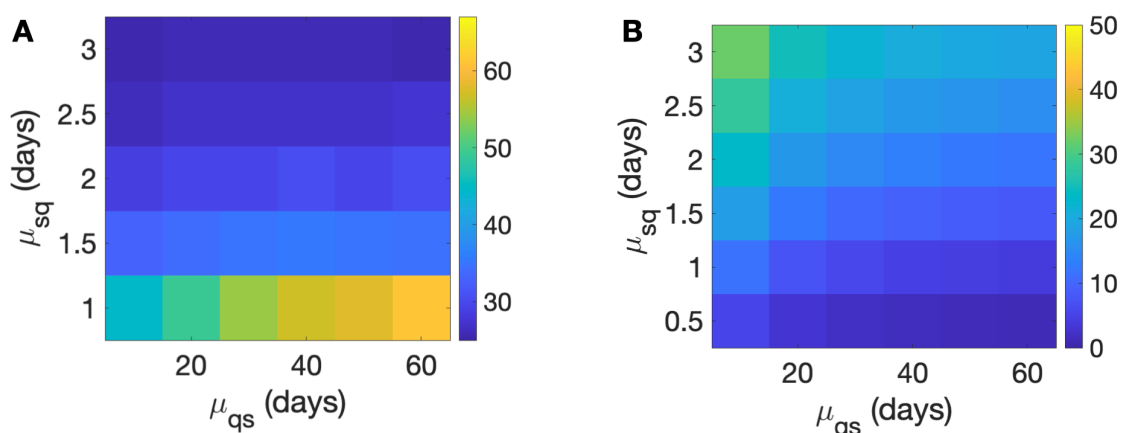

785

786 **Supplementary Fig. S5.** Overall survival in days **(A)** and Ki67 % **(B)** obtained

787 from different combinations of initial ranges of parameters  $\mu_{sq}$  and  $\mu_{qs}$ .

788

789

790

## 791 REFERENCES

- 792 1. Brat DJ, Aldape K, Colman H, et al. cIMPACT-NOW update 3: recommended diagnostic  
793 criteria for "Diffuse astrocytic glioma, IDH-wildtype, with molecular features of  
794 glioblastoma, WHO grade IV". *Acta Neuropathol.* 2018; 136(5):805-810.
- 795 2. Louis DN, Perry A, Wesseling P, et al. The 2021 WHO Classification of Tumors of the  
796 Central Nervous System: a summary. *Neuro Oncol.* 2021;23(8):1231-1251.
- 797 3. Louis DN, Perry A, Reifenberger G, et al. The 2016 World Health Organization  
798 Classification of Tumors of the Central Nervous System: a summary. *Acta Neuropathol.*  
799 2016; 131(6):803-820.
- 800 4. Louis DN, Wesseling P, Aldape K, et al. cIMPACT-NOW update 6: new entity and  
801 diagnostic principle recommendations of the cIMPACT-Utrecht meeting on future CNS  
802 tumor classification and grading. *Brain Pathol.* 2020; 30(4):844-856.
- 803 5. Brennan CW, Verhaak RG, McKenna A, et al. The somatic genomic landscape of  
804 glioblastoma. *Cell.* 2013; 155(2):462-477.
- 805 6. Weller M, van den Bent M, Preusser M, et al. EANO guidelines on the diagnosis and  
806 treatment of diffuse gliomas of adulthood. *Nat Rev Clin Oncol.* 2021; 18(3):170-186.
- 807 7. Stupp R, Mason WP, van den Bent MJ, et al. Radiotherapy plus concomitant and  
808 adjuvant temozolomide for glioblastoma. *N Engl J Med.* 2005; 352(10):987-996.
- 809 8. Zhang J, Stevens MF, Bradshaw TD. Temozolomide: mechanisms of action, repair and  
810 resistance. *Curr Mol Pharmacol.* 2012; 5(1):102-114.
- 811 9. Mur P, Rodríguez de Lope Á, Díaz-Crespo FJ, et al. Impact on prognosis of the regional  
812 distribution of MGMT methylation with respect to the CpG island methylator phenotype  
813 and age in glioma patients. *J Neurooncol.* 2015; 122(3):441-450.
- 814 10. Bady P, Delorenzi M, Hegi ME. Sensitivity Analysis of the MGMT-STP27 Model and  
815 Impact of Genetic and Epigenetic Context to Predict the MGMT Methylation Status in  
816 Gliomas and Other Tumors. *J Mol Diagn.* 2016; 18(3):350-361.
- 817 11. Wick W, Platten M, Weller M. New (alternative) temozolomide regimens for the  
818 treatment of glioma. *Neuro Oncol.* 2009; 11(1):69-79.
- 819 12. Gilbert MR, Wang M, Aldape KD, et al. Dose-dense temozolomide for newly diagnosed  
820 glioblastoma: a randomized phase III clinical trial. *J Clin Oncol.* 2013; 31(32):4085-4091.
- 821 13. Berrocal A, Perez Segura P, Gil M, et al. Extended-schedule dose-dense temozolomide in  
822 refractory gliomas. *J Neurooncol.* 2010; 96(3):417-422.
- 823 14. Taal W, Segers-van Rijn JM, Kros JM, et al. Dose dense 1 week on/1 week off  
824 temozolomide in recurrent glioma: a retrospective study. *J Neurooncol.* 2012;  
825 108(1):195-200.
- 826 15. Nagane M. Dose-dense Temozolomide: Is It Still Promising?. *Neurol Med Chir (Tokyo).*  
827 2015; 55 Suppl 1:38-49.
- 828 16. Wei W, Chen X, Ma X, Wang D, Guo Z. The efficacy and safety of various dose-dense  
829 regimens of temozolomide for recurrent high-grade glioma: a systematic review with  
830 meta-analysis. *J Neurooncol.* 2015; 125(2):339-349.
- 831 17. Pérez-García VM, Ayala-Hernández LE, Belmonte-Beitia J, et al. Computational design of  
832 improved standardized chemotherapy protocols for grade II oligodendrogliomas. *PLoS*  
833 *Comput Biol.* 2019; 15(7):e1006778.
- 834 18. Altrock PM, Liu LL, Michor F. The mathematics of cancer: integrating quantitative  
835 models. *Nat Rev Cancer.* 2015; 15(12):730-745.
- 836 19. Ribba B, Kaloshi G, Peyre M, et al. A tumor growth inhibition model for low-grade glioma  
837 treated with chemotherapy or radio-therapy. *Clin Cancer Res* 2012; 15:5071–5080
- 838 20. Mazzocco P, Honnorat J, Ducray F, Ribba B. Increasing the Time Interval between PCV  
839 Chemotherapy Cycles as a Strategy to Improve Duration of Response in Low-Grade

- 840 Gliomas: Results from a Model- Based Clinical Trial Simulation. *Comp Math Meth in*  
841 *Medicine* 2015; 2015:297903.
- 842 21. Henares-Molina A, Benzekry S, Lara PC, García-Rojo M, Pérez-García VM, Martínez-  
843 González A. Non-standard radiotherapy fractionations delay the time to malignant  
844 transformation of low-grade gliomas. *PLoS One*. 2017; 12(6):e0178552.
- 845 22. Fisher BJ, Naumova E, Leighton CC, et al. Ki-67: a prognostic factor for low-grade glioma?  
846 *Int J Radiat Oncol Biol Phys*. 2002; 52(4):996-1001.
- 847 23. Liang J, Lv X, Lu C, et al. Prognostic factors of patients with Gliomas - an analysis on 335  
848 patients with Glioblastoma and other forms of Gliomas. *BMC Cancer*. 2020; 20(1):35.
- 849 24. Perez-Garcia VM, Perez-Romasanta LA. Extreme protraction for low-grade gliomas:  
850 theoretical proof of concept of a novel therapeutical strategy. *Math Med Biol*. 2016;  
851 33(3):253-271.
- 852 25. Fedele M, Cerchia L, Pegoraro S, Sgarra R, Manfioletti G. Proneural-Mesenchymal  
853 Transition: Phenotypic plasticity to acquire multitherapy resistance in glioblastoma. *Int*  
854 *J Mol Sci*. 2019; 20(11):2746.
- 855 26. Minata M, Audia A, Shi J, et al. Phenotypic plasticity of invasive edge glioma stem-like  
856 cells in response to ionizing radiation. *Cell Reports* 2019; 26:1893-1905.
- 857 27. Sharma SV, Lee DY, Li B, et al. A chromatin-mediated reversible drug-tolerant state in  
858 cancer cell subpopulations. *Cell*. 2010; 141(1):69-80.
- 859 28. Cabanos HF, Hata AN. Emerging Insights into Targeted Therapy-Tolerant Persister Cells  
860 in Cancer. *Cancers (Basel)*. 2021; 13(11).
- 861 29. Rabé M, Dumont S, Álvarez-Arenas A, et al. Identification of a transient state during the  
862 acquisition of temozolomide resistance in glioblastoma. *Cell Death Dis*. 2020; 11(1):19.
- 863 30. Gargini R, Segura-Collar B, Herranz B, et al. The IDH-TAU-EGFR triad defines the  
864 neovascular landscape of diffuse gliomas. *Sci Transl Med*. 2020; 12(527).
- 865 31. Segura-Collar B, Garranzo-Asensio M, Herranz B, et al. Tumor-derived pericytes driven  
866 by EGFR mutations govern the vascular and immune microenvironment of gliomas.  
867 *Cancer Res*. 2021.
- 868 32. Dragoj M, Stojkowska J, Stanković T, et al. Development and Validation of a Long-Term  
869 3D Glioblastoma Cell Culture in Alginate Microfibers as a Novel Bio-Mimicking Model  
870 System for Preclinical Drug Testing. *Brain Sciences*. 2021; 11(8):1025.
- 871 33. Livak KJ, Schmittgen TD. Analysis of relative gene expression data using real-time  
872 quantitative PCR and the 2<sup>-Delta Delta C(T)</sup> Method. *Methods*. 2001; 25(4):402-408.
- 873 34. Ayala-Hernández LE, Gallegos A, Schucht P, et al. Optimal Combinations of  
874 Chemotherapy and Radiotherapy in Low-Grade Gliomas: A Mathematical Approach. *J*  
875 *Pers. Med*. 2021; 11(10):1036.
- 876 35. Jiménez-Sánchez J, Martínez-Rubio Á, Popov A, et al. A mesoscopic simulator to uncover  
877 heterogeneity and evolutionary dynamics in tumors. *PLoS Comput Biol*. 2021; 17(2):  
878 e1008266.
- 879 36. Pérez-Beteta J, Molina-García D, Ortiz-Alhambra JA, et al. Tumor Surface Regularity at  
880 MR Imaging Predicts Survival and Response to Surgery in Patients with Glioblastoma.  
881 *Radiology*. 2018; 288(1):218-225.
- 882 37. Bette S, Barz M, Wiestler B, et al. Prognostic Value of Tumor Volume in Glioblastoma  
883 Patients: Size Also Matters for Patients with Incomplete Resection [published correction  
884 appears in *Ann Surg Oncol*. 2018;25(Suppl 3):989]. *Ann Surg Oncol*. 2018; 25(2):558-564.
- 885 38. He Y, Kaina B. Are There Thresholds in Glioblastoma Cell Death Responses Triggered by  
886 Temozolomide?. *Int J Mol Sci*. 2019; 20(7):1562.
- 887 39. Bhat KPL, Balasubramanian V, Vaillant B, et al. Mesenchymal differentiation mediated  
888 by NF-κB promotes radiation resistance in glioblastoma. *Cancer Cell*. 2013; 24(3):331-  
889 46.
- 890 40. Furnari FB, Cloughesy TF, Cavenee WK, Mischel PS. Heterogeneity of epidermal growth  
891 factor receptor signalling networks in glioblastoma. *Nat. Rev. Cancer*. 2015; 15:302–310.



- 892 41. Zahonero C, Sanchez-Gomez P. EGFR-dependent mechanisms in glioblastoma: Towards  
893 a better therapeutic strategy. *Cell Mol Life Sci.* 2014; 71:3465-3488.
- 894 42. Hegi ME, Diserens AC, Gorlia T, et al. MGMT gene silencing and benefit from  
895 temozolomide in glioblastoma. *New England Journal of Medicine.* 2015; 352(10):997-  
896 1003.
- 897 43. Meng X, Zhao Y, Han B. et al. Dual functionalized brain-targeting nanoinhibitors restrain  
898 temozolomide-resistant glioma via attenuating EGFR and MET signaling pathways. *Nat*  
899 *Commun.* 2020; 11(1):1-15.
- 900 44. Barciszewska AM, Gurda D, Głodowicz P, Nowak S, Naskręt-Barciszewska MZ. A New  
901 Epigenetic Mechanism of Temozolomide Action in Glioma Cells. *PLOS ONE.* 2015;  
902 10(8):e0136669.
- 903 45. Malta TM, de Souza CF, Sabedot TS, et al. Glioma CpG island methylator phenotype (G-  
904 CIMP): biological and clinical implications. *Neuro Oncol.* 2018; 20(5):608-620.
- 905 46. Vaios EJ, Nahed BV, Muzikansky A, Fathi AT, Dietrich J. Bone marrow response as a  
906 potential biomarker of outcomes in glioblastoma patients, *Journal of Neurosurgery JNS.*  
907 2017; 127(1):132-138.
- 908 47. Arora A, Somasundaram K. Glioblastoma vs temozolomide: can the red queen race be  
909 won?. *Cancer Biol Ther.* 2019; 20(8):1083-1090.
- 910 48. Lee SY. Temozolomide resistance in glioblastoma multiforme. *Genes Dis.* 2016; 3(3):198-  
911 210.
- 912 49. Jiapaer S, Furuta T, Tanaka S, Kitabayashi T, Nakada M. Potential Strategies Overcoming  
913 the Temozolomide Resistance for Glioblastoma. *Neurol Med Chir (Tokyo).* 2018;  
914 58(10):405-421.
- 915 50. Verhaak RG, Hoadley KA, Purdom E, et al. Integrated genomic analysis identifies clinically  
916 relevant subtypes of glioblastoma characterized by abnormalities in PDGFRA, IDH1,  
917 EGFR, and NF1. *Cancer Cell.* 2010;17(1):98-110.
- 918  
919  
920  
921  
922
